# Supplementary material for: A general approach to S-rhodamines from diaryl thioethers and their application in constructing pH probes
Source: Royal Society of Chemistry journal article supplement (doi:10.1039/d2ob01086k), 2022-01-01
Supplement: d2ob01086k1.pdf [file d2ob01086k1.pdf]

## Supporting Information

### **A general approach to S-rhodamines from diaryl thioethers and its application for constructing pH probe**

Dongsheng Sun <sup>a</sup>, Shixu Yang <sup>b</sup>, Junxia Ma <sup>c</sup>, Can Liu <sup>b</sup>, Jiabing Sun <sup>b</sup>, Yulong Li <sup>b</sup>, Fei Deng <sup>b,\*</sup>

<sup>a</sup>Department of Basic Medicine, Medical college, Taizhou University, Taizhou, Zhejiang 318000, China.

<sup>b</sup>School of Chemistry and Chemical Engineering, Jinggangshan University, Ji'an, Jiangxi 343009, China.

<sup>c</sup>Zhejiang Provincial Key Laboratory of Plant Evolutionary Ecology and Conservation, Taizhou University, Taizhou, Zhejiang 318000, China

\*Corresponding authors

E-mail addresses: [dengfei@jgsu.edu.cn](mailto:dengfei@jgsu.edu.cn) (F. Deng).

## **CONTENTS**

1. Experimental section
2. NMR spectra of the compounds.
3. HRMS data of the compounds.
4. Spectral details of the compounds.
5. Results of theoretical calculations.

## 1. Experimental section

### 1.1 Materials and Instruments

Unless otherwise stated, all reagents and solvents for synthesis and detection were purchased from commercial suppliers and used without further purification. All water used was from Millipore water purification system with a minimum resistivity of 18.0 M $\Omega$ ·cm. <sup>1</sup>H NMR and <sup>13</sup>C NMR spectra were recorded on Bruker 400 spectrometer. Mass spectrometry data were obtained with Waters Xevo G2-XS QToF. UV-Vis absorption spectra were collected on Shimadzu UV-1900i Spectrophotometer. Fluorescence measurements were performed on PerkinElmer LS55 and Zolix SFQY-9000 fluorescence spectrophotometers. The fluorescence imaging was performed by using Olympus FV1000 MPE confocal laser scanning microscope.

### 1.2 Synthesis

**3,3'-thiobis(*N,N*-dimethylaniline)**: This compound was synthesized according to the literature with slight modification <sup>1</sup>. The mixture of 3-iodide-*N,N*-diethylaniline (3.95 g, 16 mmol), CuI (305 mg, 1.6 mmol), K<sub>2</sub>CO<sub>3</sub> (2.21 g, 16 mmol), Na<sub>2</sub>S·9H<sub>2</sub>O (2.5 g, 10.4 mmol), and 15 mL DMF were stirred vigorously at 120 °C for 15 h under N<sub>2</sub>. The resulting mixture was cooled to room temperature and diluted with EtOAc (100 mL). After washing with water (2 × 50 mL) and brine (50 mL), the organic layers dried over Na<sub>2</sub>SO<sub>4</sub> and then concentrated under vacuum. The residue was purified by column chromatography to give product (2.05 g, 94%). <sup>1</sup>H NMR (400 MHz, CDCl<sub>3</sub>)  $\delta$  7.14 (t, *J* = 8.0 Hz, 2H), 6.81 – 6.72 (m, 2H), 6.69 (d, *J* = 7.6 Hz, 2H), 6.59 (dd, *J* = 8.4, 2.5 Hz, 2H), 2.90 (s, 12H). <sup>13</sup>C NMR (100 MHz, CDCl<sub>3</sub>)  $\delta$  151.04, 136.44, 129.56, 119.05, 114.79, 111.20, 40.50.

**SRho**: 3,3'-thiobis(*N,N*-dimethylaniline) (109 mg, 0.4 mmol, 1.0 equiv.), 2-carboxybenzaldehyde (0.4-3.2 mmol, 1.0-8.0 equiv.), Lewis acid catalyst (0.04 mmol, 0.1 equiv.) were mixed in a sealable pressure tube. The tube was sealed tightly and heated at 100-140 °C for 1-8 h. The mixture gradually turned a deep purple. After cooling to room temperature, the reaction mixture was purified directly by column chromatography on silica gel (ethyl acetate : triethylamine = 200 : 1) to give the desired compounds as violet powder. <sup>1</sup>H NMR (400 MHz, CDCl<sub>3</sub>)  $\delta$  7.97 (d, *J* = 7.8 Hz, 1H), 7.61 (dd, *J* = 25.5, 7.0 Hz, 3H), 6.87 (d, *J* = 8.9 Hz, 2H), 6.75 (d, *J* = 2.7 Hz, 2H), 6.47 (dd, *J* = 8.9, 2.7 Hz, 2H), 2.97 (s, 12H). <sup>13</sup>C NMR (101 MHz, CDCl<sub>3</sub>)  $\delta$

170.24, 153.63, 150.09, 134.30, 133.36, 129.28, 127.93, 126.21, 125.52, 124.00, 119.80, 110.67, 108.46, 40.22. MS (ESI)  $m/z$ : calcd. for  $C_{24}H_{23}N_2O_2S$   $[M+H]^+$  403.1480, observed 403.1477.

General procedure for synthesis of **R-SRho**: To a sealable pressure tube added 3,3'-thiobis(*N,N*-dimethylaniline) (109 mg, 0.4 mmol, 1.0 equiv.), substituted 2-carboxybenzaldehyde (2 mmol, 5.0 equiv.), copper(II) bromide (9 mg, 0.04 mmol, 0.1 equiv.) and 200  $\mu$ L nitrobenzene. The tube was sealed tightly and heated at 120 °C for 5 h. The mixture gradually turned a deep purple. After cooling to room temperature, the reaction mixture was purified directly by column chromatography on silica gel (ethyl acetate : triethylamine = 200 : 1) to give the desired compounds as violet powder. **6-Br-SRho**: 58 mg, 30%;  $^1H$  NMR (400 MHz,  $CDCl_3$ )  $\delta$  7.79 (d,  $J$  = 8.2 Hz, 1H), 7.73 (s, 1H), 7.65 (dt,  $J$  = 8.1, 1.3 Hz, 1H), 6.92 (d,  $J$  = 8.9 Hz, 2H), 6.72 (d,  $J$  = 2.5 Hz, 2H), 6.49 (dd,  $J$  = 9.0, 2.6 Hz, 2H), 2.96 (s, 12H);  $^{13}C$  NMR (100 MHz,  $CDCl_3$ )  $\delta$  169.43, 155.76, 150.20, 132.96, 132.89, 129.55, 127.71, 126.97, 126.89, 124.49, 119.13, 110.86, 108.41, 40.23; MS (ESI)  $m/z$ : calcd. for  $C_{24}H_{22}N_2O_2SBr$   $[M+H]^+$  481.0585, observed 481.0588. **6-CO<sub>2</sub>Me-SRho**: 35 mg, 19%;  $^1H$  NMR (400 MHz,  $CDCl_3$ )  $\delta$  8.26 – 8.15 (m, 2H), 8.01 (d,  $J$  = 7.9 Hz, 1H), 6.81 (d,  $J$  = 9.0 Hz, 2H), 6.73 (d,  $J$  = 2.5 Hz, 2H), 6.44 (dd,  $J$  = 8.9, 2.6 Hz, 2H), 3.90 (s, 3H), 2.95 (s, 12H);  $^{13}C$  NMR (100 MHz,  $CDCl_3$ )  $\delta$  169.26, 165.81, 153.61, 150.18, 135.59, 133.50, 130.61, 129.87, 127.99, 125.63, 125.34, 118.99, 110.72, 108.41, 52.67, 40.22; MS (ESI)  $m/z$ : calcd. for  $C_{26}H_{25}N_2O_4S$   $[M+H]^+$  461.1535, observed 461.1534. **5-NO<sub>2</sub>-SRho**: 50 mg, 28%;  $^1H$  NMR (400 MHz,  $CDCl_3$ )  $\delta$  8.76 (d,  $J$  = 2.0 Hz, 1H), 8.47 – 8.39 (m, 1H), 7.77 (d,  $J$  = 8.4 Hz, 1H), 6.88 (d,  $J$  = 8.9 Hz, 2H), 6.72 (d,  $J$  = 2.4 Hz, 2H), 6.47 (dd,  $J$  = 9.0, 2.5 Hz, 2H), 2.96 (s, 12H);  $^{13}C$  NMR (100 MHz,  $CDCl_3$ )  $\delta$  168.05, 159.55, 150.31, 148.93, 132.70, 129.35, 127.43, 126.87, 124.92, 121.35, 118.15, 110.85, 108.45, 40.20; MS (ESI)  $m/z$ : calcd. for  $C_{24}H_{22}N_3O_4S$   $[M+H]^+$  448.1331, observed 448.1334.

**SRho-pH**: **SRho** (81 mg, 0.2 mmol), 4-(2-aminoethyl) morpholine (78 mg, 0.6 mmol) and benzotriazol-1-yl-oxytripyrrolidinophosphonium hexafluorophosphate (PyBop) (104 mg, 0.2 mmol) were dissolved in 15 mL  $CH_2Cl_2$ . The mixture was stirred for 24 h at room temperature before evaporated under reduced pressure. The crude product was purified by column chromatography to afford pure product (55 mg, 53%).  $^1H$  NMR (400 MHz,  $CDCl_3$ )  $\delta$  7.91 (dd,  $J$  = 5.9, 2.8 Hz, 1H), 7.53 – 7.39 (m, 2H), 7.15 (dd,  $J$  = 5.8, 2.7 Hz, 1H), 6.62 – 6.48 (m, 4H), 6.39 (dd,  $J$  = 9.0, 2.7 Hz, 2H), 3.62 (t,  $J$  = 4.7 Hz, 4H), 3.37 (t,  $J$  = 7.6 Hz, 2H), 2.95 (s, 12H), 2.33 (s, 4H),

2.21 (t,  $J = 7.6$  Hz, 2H);  $^{13}\text{C}$  NMR (100 MHz,  $\text{CDCl}_3$ )  $\delta$  168.17, 154.54, 149.58, 132.53, 132.34, 130.81, 130.17, 128.04, 123.52, 122.96, 117.86, 111.27, 106.89, 69.20, 66.90, 55.87, 53.19, 40.17, 37.88; MS (ESI)  $m/z$ : calcd. for  $\text{C}_{30}\text{H}_{35}\text{N}_4\text{O}_2\text{S}$   $[\text{M}+\text{H}]^+$  515.2481, observed 515.2478.

### 1.3 Sample preparation

All compounds were dissolved in DMSO to afford 2 mM stock solution. The stock solutions of **SRho** and **R-SRhos** were diluted to 2  $\mu\text{M}$  with PBS buffer solution (pH 7.40) for absorbance and fluorescence measurements. The stock solution of **SRho-pH** was diluted to 5  $\mu\text{M}$  with different pH BR buffer solution for fluorescence measurements.

### 1.4 Determination of $\Phi$ and $pK_a$ .

The fluorescence quantum yields ( $\Phi$ ) were determined using **SRho** ( $\Phi = 0.47$  in methanol) <sup>2</sup> as the standard and calculated using the following equation:

$$\Phi_s = \Phi_r \times \frac{A_r F_s n_s^2}{A_s F_r n_r^2}$$

where, the subscripts "s" and "r" stand for sample and reference, respectively. A is the absorbance. F is the integrated fluorescence intensity and n is the refractive index of the solvent.

$pK_a$  of **SRho-pH** was determined by non-linear regression using the following equation:

$$F = \frac{F_{max} + F_{min} \times 10^{pH - pK_a}}{1 + 10^{pH - pK_a}}$$

### 1.5 Computational details

All the calculations were carried out at the ORCA 5.0.0 <sup>3-5</sup> program package using density functional theory (DFT) or time-dependent density functional theory (TD-DFT). The ground states geometries of dyes were optimized at r<sup>2</sup>SCAN-3c <sup>6</sup> composite method. Single point energies of the optimized structures were further calculated at RI- $\omega$ B97M-V/def2-TZVP level. The excited states were calculated at RI-PBE0/def2-SV(P) level. All the calculations were conducted in conductor-like polarizable continuum model (CPCM) of water. The corresponding molecular orbital composition, absorption and emission were analyzed by Multiwfn <sup>7</sup>. Molecular representations were conducted by Avogadro <sup>8</sup> and VMD <sup>9</sup>.

### 1.6 Cell culture and imaging experiments

About  $2 \times 10^4$  HuH-7 cells were seeded into confocal dish (35 mm, NEST) and cultured in

Dulbecco's modified Eagle's medium (DMEM, Gibco) supplied with 10% fetal bovine serum (FBS, Gibco) under standard culture conditions (atmosphere of 5% CO<sub>2</sub> and 95% air at 37 °C) for 48 h. The cells were then rinsed twice with PBS and incubated with FBS-free DMEM containing **SRho-pH** (5 μM) and commercial dye (1 μM) for 15 min. After incubation, cells were rinsed with PBS twice again for imaging.

## 2. NMR spectra of the compounds

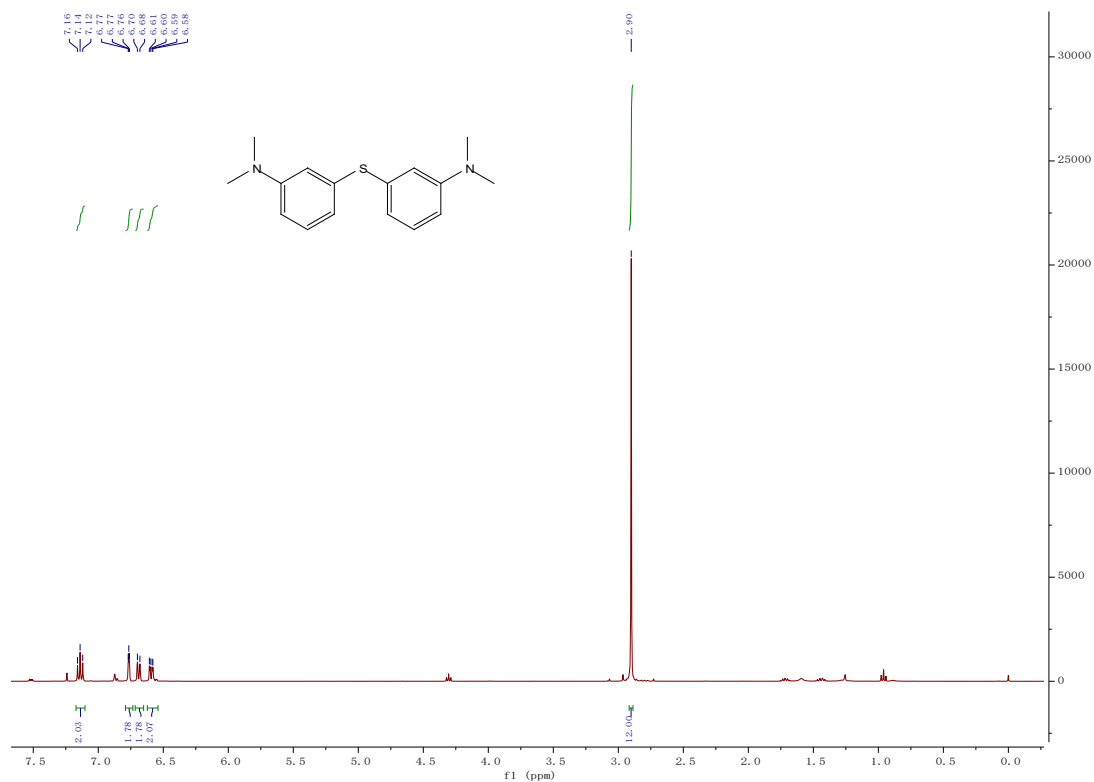

Fig. S1.  $^1\text{H}$  NMR spectrum of 3,3'-thiobis(*N,N*-dimethylaniline) in  $\text{CDCl}_3$ .

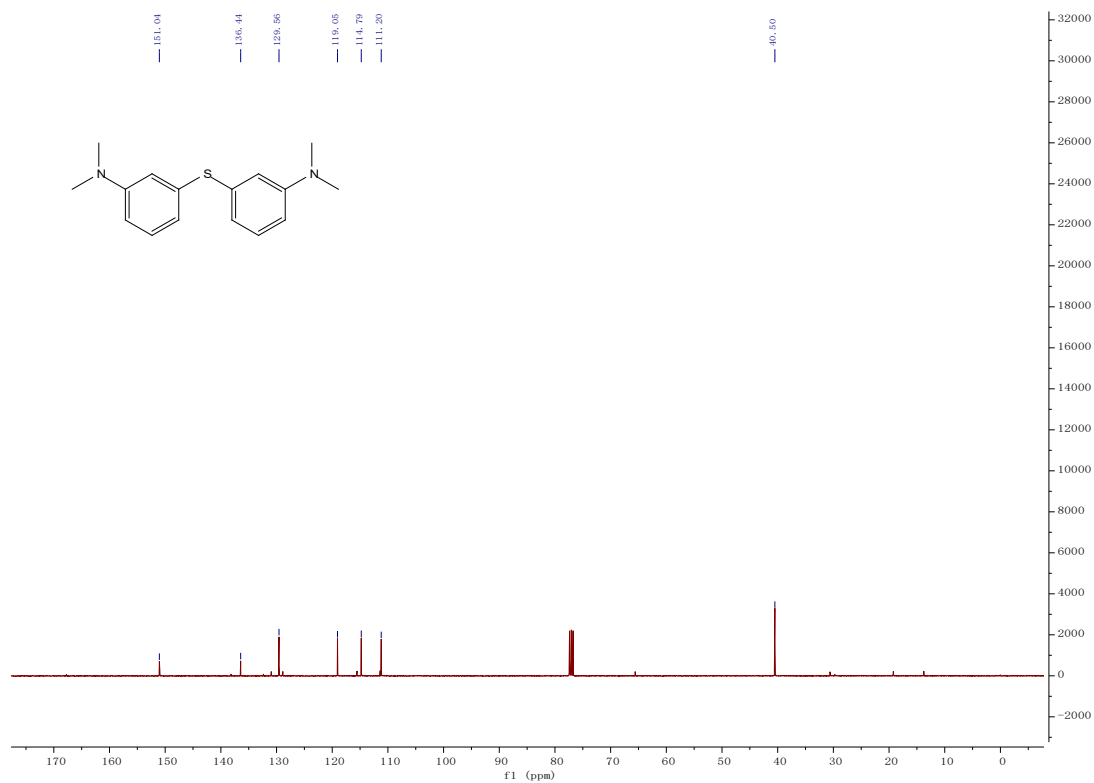

Fig. S2.  $^{13}\text{C}$  NMR spectrum of 3,3'-thiobis(*N,N*-dimethylaniline) in  $\text{CDCl}_3$ .

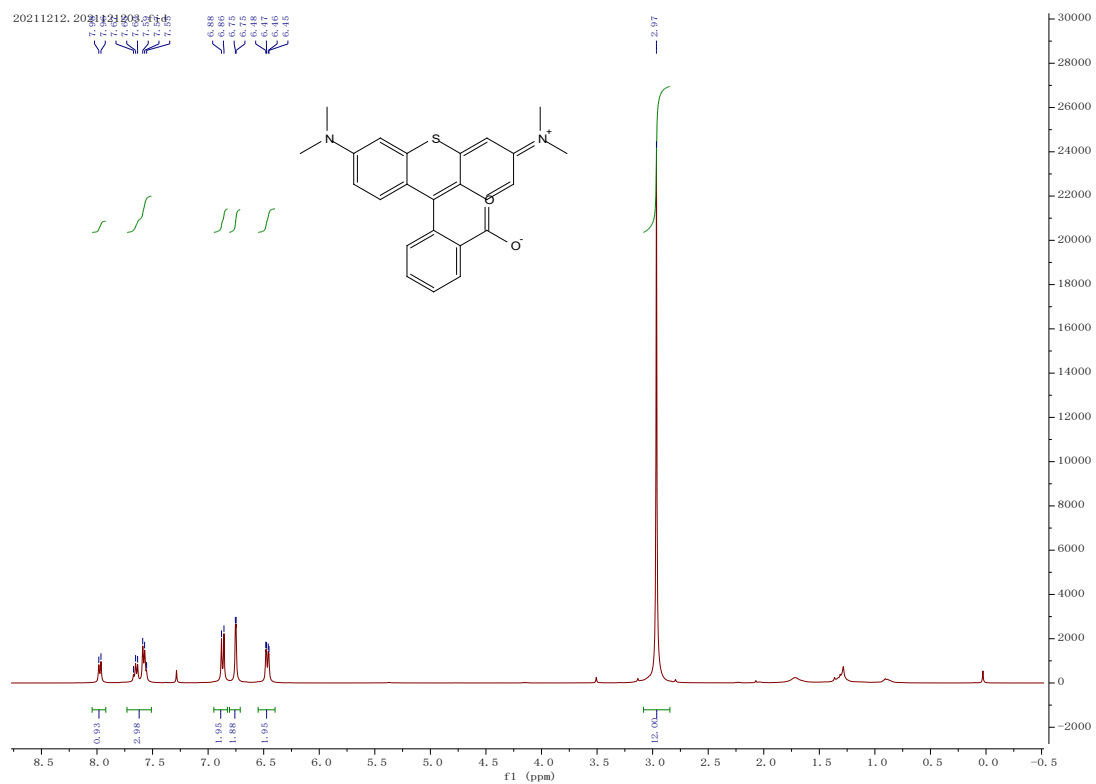

Fig. S3.  $^1\text{H}$  NMR spectrum of **SRho** in  $\text{CDCl}_3$ .

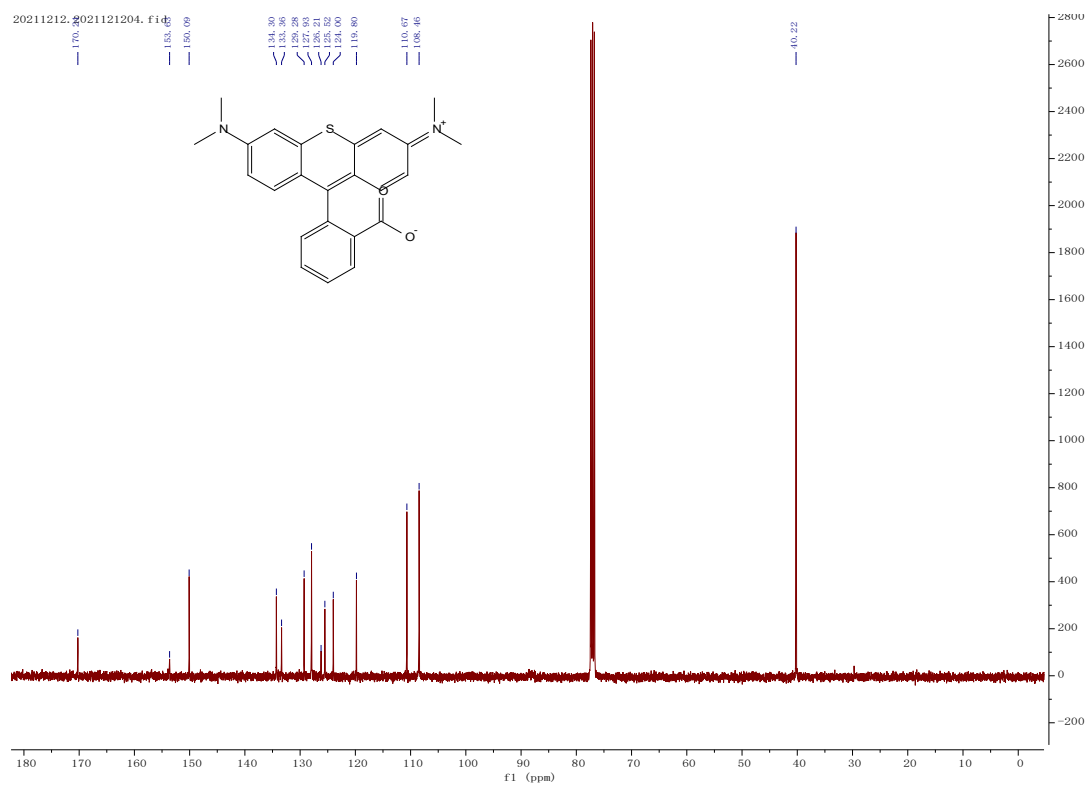

Fig. S4.  $^{13}\text{C}$  NMR spectrum of **SRho** in  $\text{CDCl}_3$ .



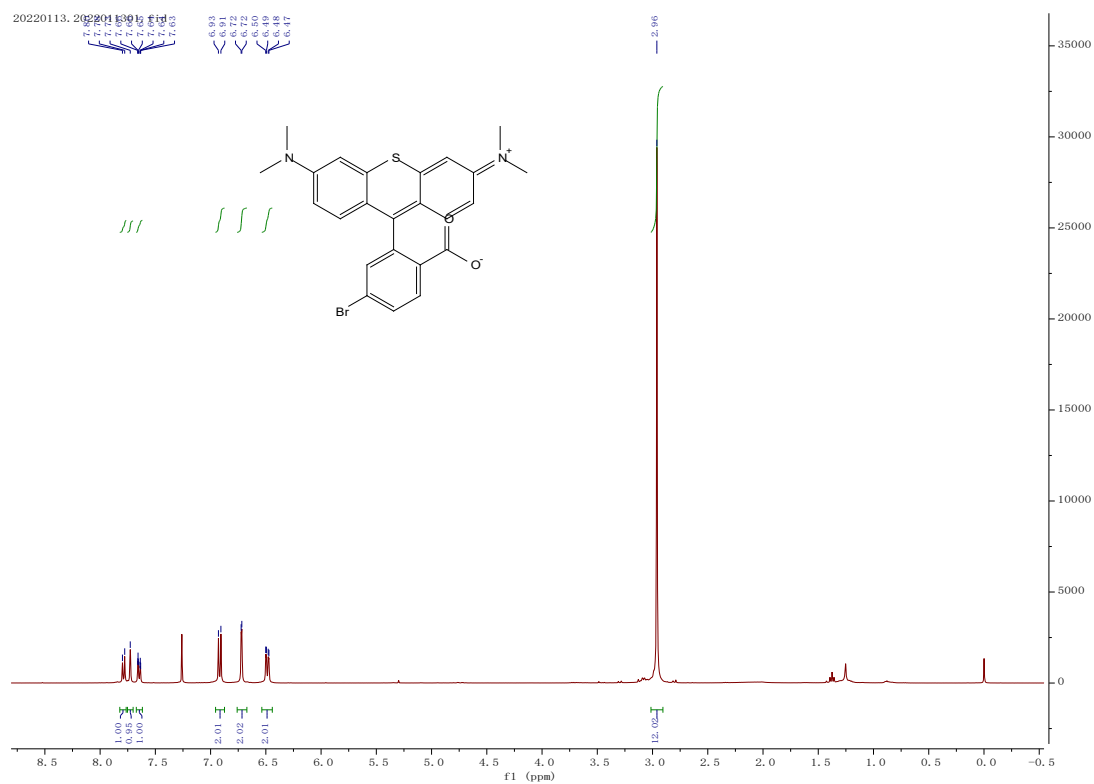

Fig. S5.  $^1\text{H NMR}$  spectrum of 6-Br-SRho in  $\text{CDCl}_3$ .

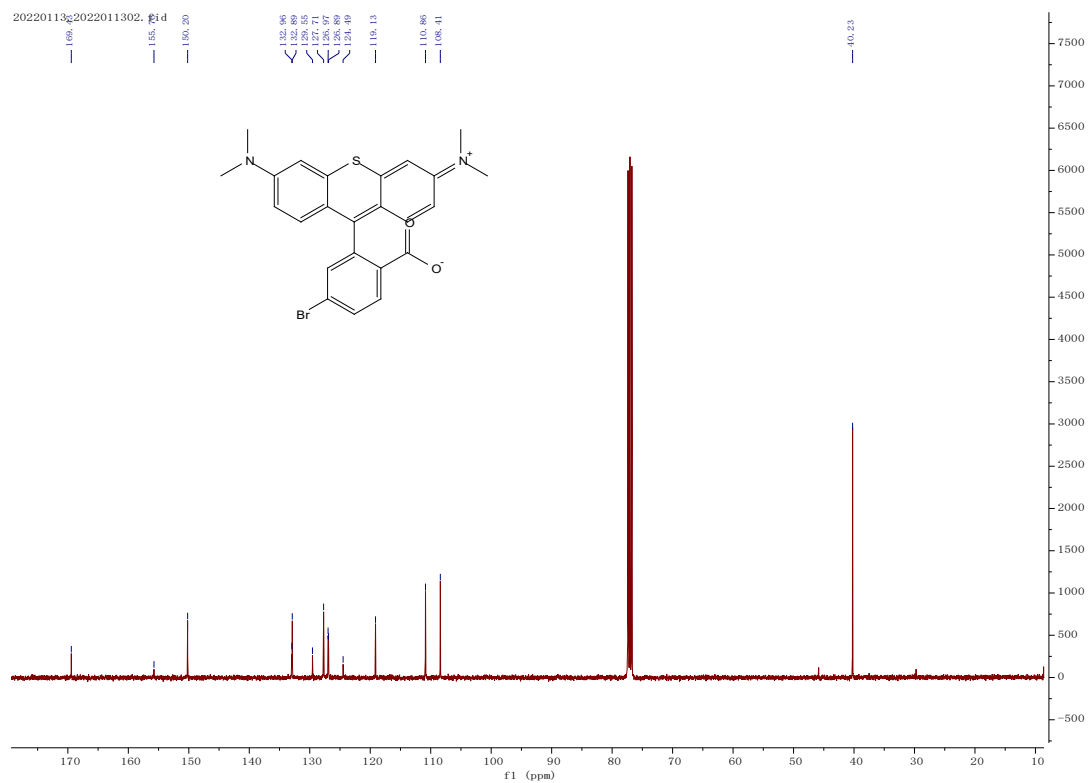

Fig. S6.  $^{13}\text{C NMR}$  spectrum of 6-Br-SRho in  $\text{CDCl}_3$ .

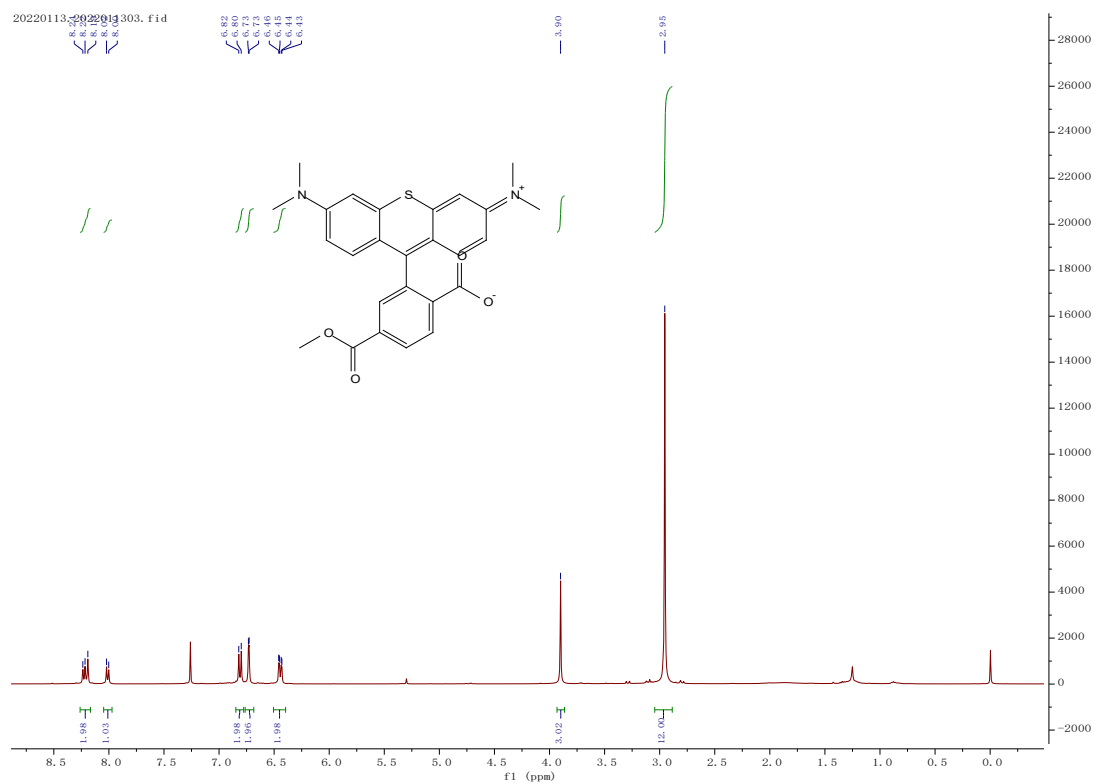

Fig. S7. <sup>1</sup>H NMR spectrum of 6-CO<sub>2</sub>Me-SRho in CDCl<sub>3</sub>.

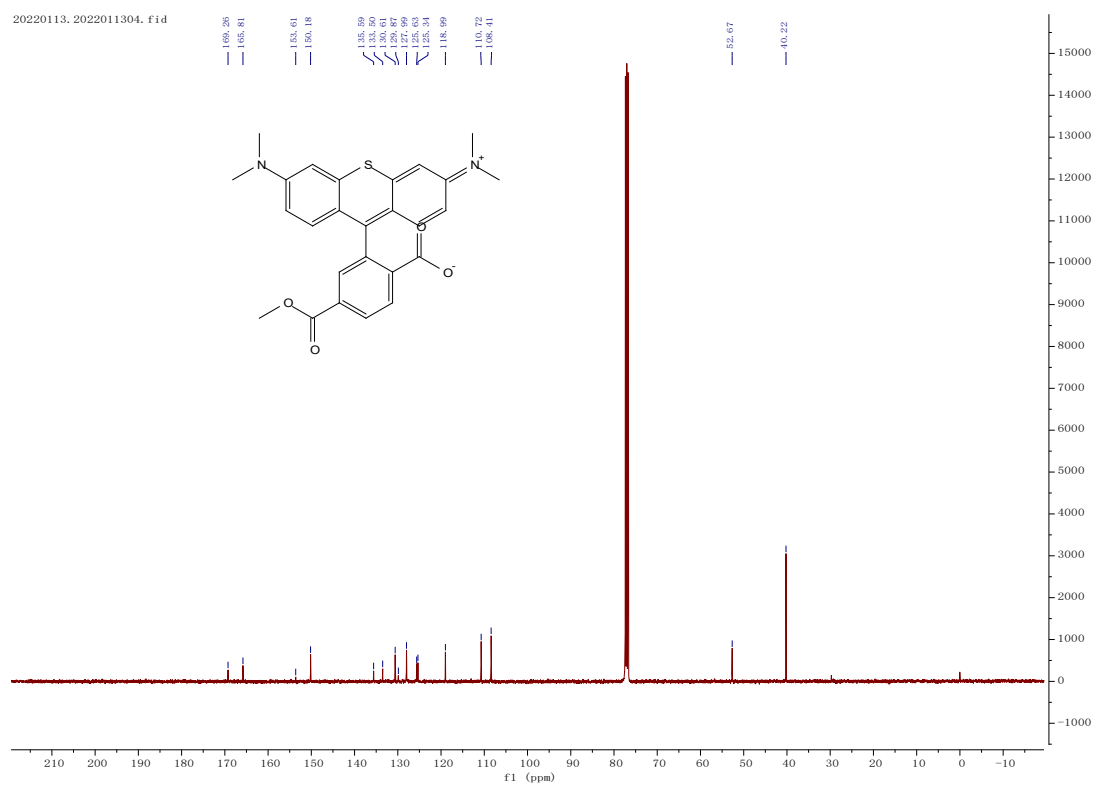

Fig. S8. <sup>13</sup>C NMR spectrum of 6-CO<sub>2</sub>Me-SRho in CDCl<sub>3</sub>.



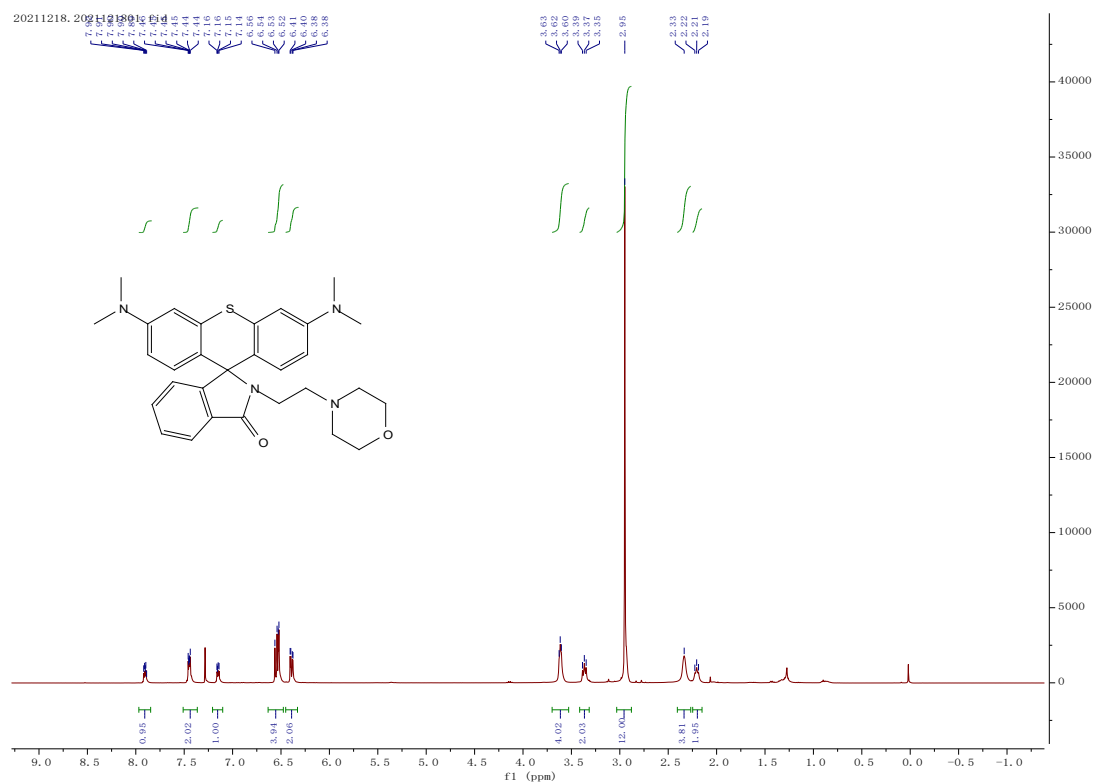

Fig. S11.  $^1\text{H}$  NMR spectrum of SRho-pH in  $\text{CDCl}_3$ .

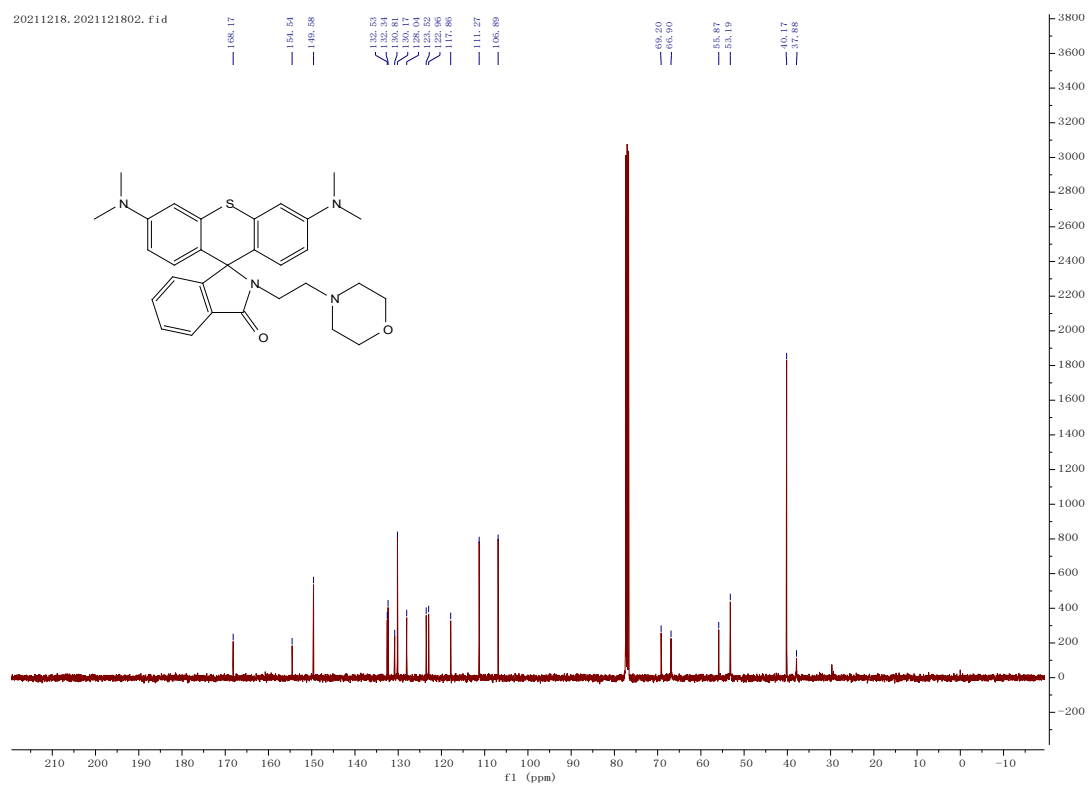

Fig. S12.  $^{13}\text{C}$  NMR spectrum of SRho-pH in  $\text{CDCl}_3$ .

### 3. HRMS data of the compounds

#### Elemental Composition Report

Page 1

##### Single Mass Analysis

Tolerance = 5.0 PPM / DBE: min = -1.5, max = 50.0

Element prediction: Off

Number of isotope peaks used for i-FIT = 3

Monoisotopic Mass, Even Electron Ions

70 formula(e) evaluated with 1 results within limits (up to 50 best isotopic matches for each mass)

Elements Used:

C: 1-40 H: 0-70 N: 1-5 O: 1-3 S: 1-1

A

1228-2-2 79 (0.455)

1: TOF MS ES+  
8.90e+006

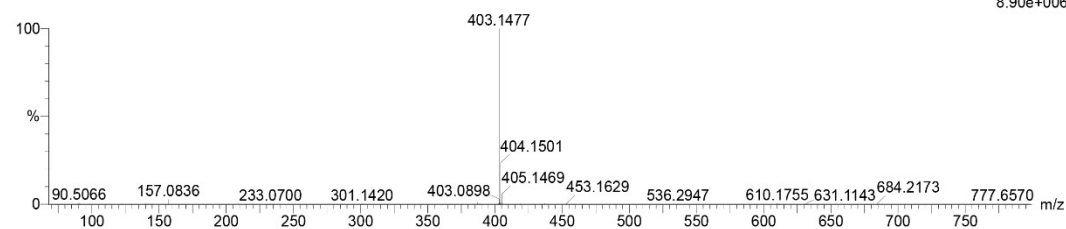

Minimum: -1.5  
Maximum: 5.0 5.0 50.0

| Mass     | Calc. Mass | mDa  | PPM  | DBE  | i-FIT  | Norm | Conf (%) | Formula                                                         |
|----------|------------|------|------|------|--------|------|----------|-----------------------------------------------------------------|
| 403.1477 | 403.1480   | -0.3 | -0.7 | 14.5 | 1379.6 | n/a  | n/a      | C <sub>24</sub> H <sub>23</sub> N <sub>2</sub> O <sub>2</sub> S |

Fig. S13. HRMS data of SRho.

#### Elemental Composition Report

Page 1

##### Single Mass Analysis

Tolerance = 10.0 PPM / DBE: min = -1.5, max = 50.0

Element prediction: Off

Number of isotope peaks used for i-FIT = 3

Monoisotopic Mass, Even Electron Ions

214 formula(e) evaluated with 1 results within limits (up to 50 best isotopic matches for each mass)

Elements Used:

C: 24-24 H: 22-22 N: 0-5 O: 0-5 S: 0-1 Br: 0-3

1

0315-1-1 131 (0.744)

1: TOF MS ES+  
1.17e+004

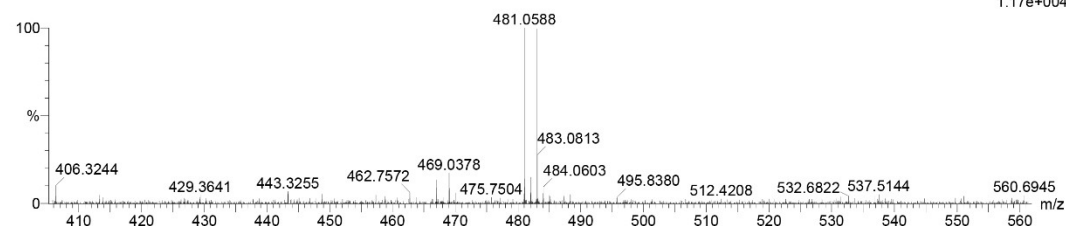

Minimum: -1.5  
Maximum: 5.0 10.0 50.0

| Mass     | Calc. Mass | mDa | PPM | DBE  | i-FIT | Norm | Conf (%) | Formula                                                            |
|----------|------------|-----|-----|------|-------|------|----------|--------------------------------------------------------------------|
| 481.0588 | 481.0585   | 0.3 | 0.6 | 14.5 | 560.9 | n/a  | n/a      | C <sub>24</sub> H <sub>22</sub> N <sub>2</sub> O <sub>2</sub> S Br |

Fig. S14. HRMS data of 6-Br-SRho.

## Single Mass Analysis

Tolerance = 10.0 PPM / DBE: min = -1.5, max = 50.0

Element prediction: Off

Number of isotope peaks used for i-FIT = 3

Monoisotopic Mass, Even Electron Ions

25 formula(e) evaluated with 1 results within limits (up to 50 best isotopic matches for each mass)

Elements Used:

C: 26-26 H: 25-25 N: 0-5 O: 0-5 S: 0-1

1

0315-1-2 139 (0.786)

1: TOF MS ES+  
7.72e+005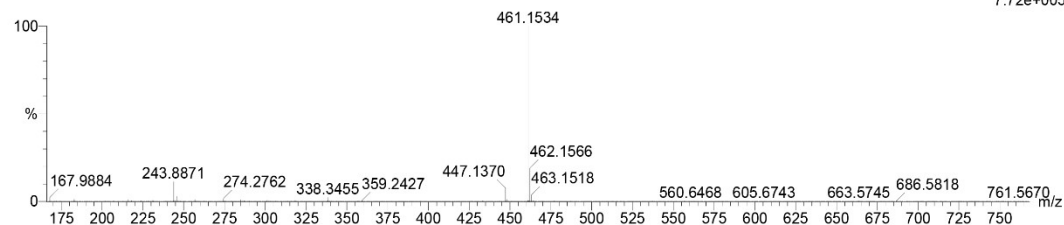

Minimum: -1.5  
Maximum: 5.0 10.0 50.0

| Mass     | Calc. Mass | mDa  | PPM  | DBE  | i-FIT | Norm | Conf (%) | Formula                                                         |
|----------|------------|------|------|------|-------|------|----------|-----------------------------------------------------------------|
| 461.1534 | 461.1535   | -0.1 | -0.2 | 15.5 | 682.6 | n/a  | n/a      | C <sub>26</sub> H <sub>25</sub> N <sub>2</sub> O <sub>4</sub> S |

Fig. S15. HRMS data of 6-CO<sub>2</sub>Me-SRho.

## Single Mass Analysis

Tolerance = 10.0 PPM / DBE: min = -1.5, max = 50.0

Element prediction: Off

Number of isotope peaks used for i-FIT = 3

Monoisotopic Mass, Even Electron Ions

34 formula(e) evaluated with 1 results within limits (up to 50 best isotopic matches for each mass)

Elements Used:

C: 24-24 H: 22-22 N: 0-5 O: 0-5 S: 0-1

1

0315-1-3 159 (0.899)

1: TOF MS ES+  
9.81e+005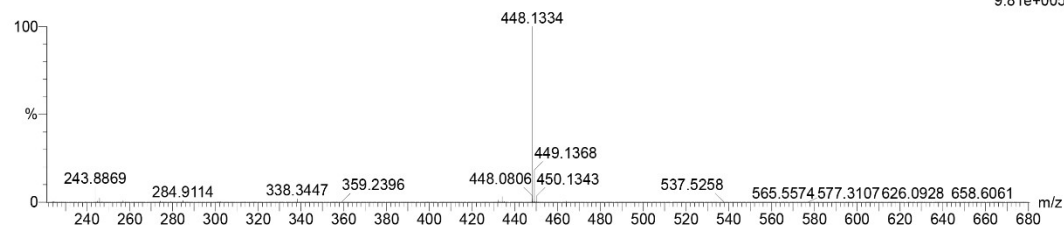

Minimum: -1.5  
Maximum: 5.0 10.0 50.0

| Mass     | Calc. Mass | mDa | PPM | DBE  | i-FIT | Norm | Conf (%) | Formula                                                         |
|----------|------------|-----|-----|------|-------|------|----------|-----------------------------------------------------------------|
| 448.1334 | 448.1331   | 0.3 | 0.7 | 15.5 | 825.6 | n/a  | n/a      | C <sub>24</sub> H <sub>22</sub> N <sub>3</sub> O <sub>4</sub> S |

Fig. S16. HRMS data of 6-NO<sub>2</sub>-SRho.

## Single Mass Analysis

Tolerance = 5.0 PPM / DBE: min = -1.5, max = 50.0

Element prediction: Off

Number of isotope peaks used for i-FIT = 3

Monoisotopic Mass, Even Electron Ions

201 formula(e) evaluated with 1 results within limits (up to 50 best isotopic matches for each mass)

Elements Used:

C: 1-41 H: 0-70 N: 1-5 O: 1-7 S: 1-1

A

1228-2.6 93 (0.537)

1: TOF MS ES+  
3.47e+005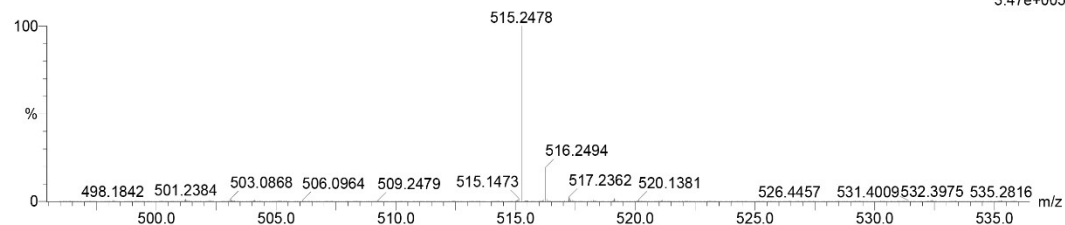Minimum: -1.5  
Maximum: 5.0 5.0 50.0

| Mass     | Calc. Mass | mDa  | PPM  | DBE  | i-FIT | Norm | Conf (%) | Formula         |
|----------|------------|------|------|------|-------|------|----------|-----------------|
| 515.2478 | 515.2481   | -0.3 | -0.6 | 15.5 | 780.1 | n/a  | n/a      | C30 H35 N4 O2 S |

Fig. S17. HRMS data of SRho-pH.

#### 4. Results of theoretical calculations

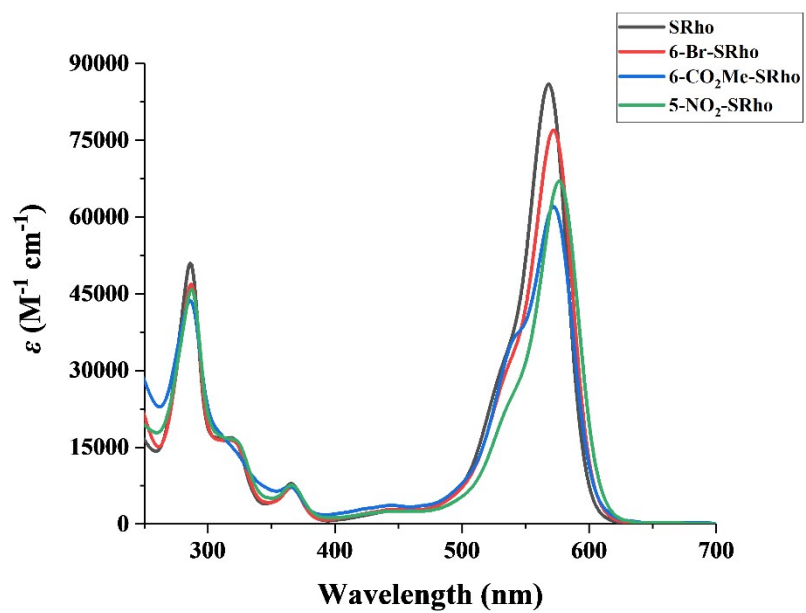

Fig. S18. Molar extinction coefficient spectra of SRhos.



## 5. Results of theoretical calculations

### 5.1 Geometry optimization

Table S1. Calculated atomic coordinates of **ORho**

| Atom# | Symbol | X        | Y        | Z        |
|-------|--------|----------|----------|----------|
| 1     | C      | 3.703485 | 0.645771 | 0.677536 |
| 2     | C      | 3.022263 | 1.901777 | 0.778413 |
| 3     | C      | 1.671818 | 1.983714 | 0.584166 |
| 4     | C      | 0.888843 | 0.842964 | 0.277999 |
| 5     | C      | 1.580259 | -0.38971 | 0.18648  |
| 6     | C      | 2.939534 | -0.50536 | 0.373725 |
| 7     | O      | 0.914393 | -1.54594 | -0.10047 |
| 8     | C      | -0.42896 | -1.52774 | -0.33975 |
| 9     | C      | -1.16433 | -0.31949 | -0.26139 |
| 10    | C      | -2.55552 | -0.41061 | -0.51659 |
| 11    | C      | -3.15621 | -1.59801 | -0.82802 |
| 12    | C      | -2.39321 | -2.80764 | -0.90928 |
| 13    | C      | -1.00339 | -2.73876 | -0.6549  |
| 14    | N      | -2.98714 | -3.98013 | -1.22246 |
| 15    | C      | -4.42795 | -4.04822 | -1.46636 |
| 16    | C      | -2.19499 | -5.20478 | -1.31158 |
| 17    | N      | 5.039527 | 0.565923 | 0.86375  |
| 18    | C      | 5.825559 | 1.759001 | 1.177701 |
| 19    | C      | 5.721958 | -0.72118 | 0.750831 |
| 20    | C      | -0.50873 | 0.873346 | 0.100877 |
| 21    | C      | -1.22744 | 2.172598 | 0.042186 |
| 22    | C      | -1.33146 | 2.795525 | -1.20544 |
| 23    | C      | -1.97968 | 4.020302 | -1.32759 |
| 24    | C      | -2.52631 | 4.632212 | -0.2012  |
| 25    | C      | -2.42034 | 4.014469 | 1.039415 |
| 26    | C      | -1.7753  | 2.783447 | 1.177335 |
| 27    | C      | -1.67163 | 2.102477 | 2.533097 |
| 28    | O      | -1.14468 | 0.952702 | 2.522899 |
| 29    | O      | -2.10931 | 2.718798 | 3.536414 |
| 30    | H      | 3.574355 | 2.804063 | 1.009737 |
| 31    | H      | 1.175748 | 2.946074 | 0.667845 |
| 32    | H      | 3.389766 | -1.48542 | 0.279749 |
| 33    | H      | -3.1539  | 0.493622 | -0.45685 |
| 34    | H      | -4.22274 | -1.61387 | -1.0139  |
| 35    | H      | -0.36752 | -3.61393 | -0.69745 |
| 36    | H      | -4.69868 | -5.08059 | -1.68527 |
| 37    | H      | -4.9962  | -3.72172 | -0.58682 |
| 38    | H      | -4.71735 | -3.42641 | -2.32256 |
| 39    | H      | -1.72325 | -5.4432  | -0.3495  |

|    |   |          |          |          |
|----|---|----------|----------|----------|
| 40 | H | -2.84746 | -6.0316  | -1.59052 |
| 41 | H | -1.40891 | -5.11183 | -2.07166 |
| 42 | H | 5.753819 | 2.505717 | 0.377273 |
| 43 | H | 5.495338 | 2.218203 | 2.117687 |
| 44 | H | 6.871041 | 1.471911 | 1.285572 |
| 45 | H | 5.339505 | -1.43858 | 1.488154 |
| 46 | H | 5.594647 | -1.14995 | -0.25148 |
| 47 | H | 6.786689 | -0.57612 | 0.930832 |
| 48 | H | -0.90028 | 2.314845 | -2.0802  |
| 49 | H | -2.05627 | 4.494454 | -2.30209 |
| 50 | H | -3.03412 | 5.588456 | -0.29238 |
| 51 | H | -2.84009 | 4.476424 | 1.927843 |

Table S2. Calculated atomic coordinates of **SRho**.

| Atom# | Symbol | X        | Y        | Z        |
|-------|--------|----------|----------|----------|
| 1     | C      | 3.848983 | 0.823465 | 0.694387 |
| 2     | C      | 3.031068 | 1.993271 | 0.755015 |
| 3     | C      | 1.683985 | 1.912893 | 0.545778 |
| 4     | C      | 1.018253 | 0.688362 | 0.261943 |
| 5     | C      | 1.843763 | -0.47021 | 0.219606 |
| 6     | C      | 3.212129 | -0.40865 | 0.423185 |
| 7     | S      | 1.195851 | -2.07099 | -0.07654 |
| 8     | C      | -0.50869 | -1.80046 | -0.37853 |
| 9     | C      | -1.10258 | -0.51055 | -0.28452 |
| 10    | C      | -2.50143 | -0.45323 | -0.5362  |
| 11    | C      | -3.24331 | -1.55461 | -0.85481 |
| 12    | C      | -2.63135 | -2.84189 | -0.95234 |
| 13    | C      | -1.24283 | -2.92856 | -0.70402 |
| 14    | N      | -3.35639 | -3.93596 | -1.27385 |
| 15    | C      | -4.79117 | -3.82929 | -1.53745 |
| 16    | C      | -2.71654 | -5.24663 | -1.36073 |
| 17    | N      | 5.184477 | 0.896118 | 0.887432 |
| 18    | C      | 5.829261 | 2.179912 | 1.163253 |
| 19    | C      | 6.006904 | -0.30993 | 0.822218 |
| 20    | C      | -0.38507 | 0.654784 | 0.078102 |
| 21    | C      | -1.10868 | 1.958676 | 0.027471 |
| 22    | C      | -1.1597  | 2.624543 | -1.20057 |
| 23    | C      | -1.81979 | 3.8437   | -1.31358 |
| 24    | C      | -2.43503 | 4.406622 | -0.1968  |
| 25    | C      | -2.385   | 3.74461  | 1.024167 |
| 26    | C      | -1.72542 | 2.519942 | 1.152386 |
| 27    | C      | -1.67384 | 1.800277 | 2.490931 |
| 28    | O      | -1.04528 | 0.702655 | 2.495756 |

|    |   |          |          |          |
|----|---|----------|----------|----------|
| 29 | O | -2.24868 | 2.338307 | 3.47009  |
| 30 | H | 3.471298 | 2.959609 | 0.967236 |
| 31 | H | 1.092715 | 2.820948 | 0.600443 |
| 32 | H | 3.790607 | -1.32386 | 0.37033  |
| 33 | H | -2.99881 | 0.508513 | -0.46719 |
| 34 | H | -4.30532 | -1.43761 | -1.03158 |
| 35 | H | -0.73377 | -3.88343 | -0.76787 |
| 36 | H | -5.17565 | -4.81633 | -1.79262 |
| 37 | H | -5.33299 | -3.46459 | -0.65589 |
| 38 | H | -4.9921  | -3.15354 | -2.37786 |
| 39 | H | -2.25987 | -5.52874 | -0.40353 |
| 40 | H | -3.46864 | -5.99241 | -1.61624 |
| 41 | H | -1.93907 | -5.25832 | -2.13547 |
| 42 | H | 5.676611 | 2.887259 | 0.338662 |
| 43 | H | 5.444057 | 2.628944 | 2.087081 |
| 44 | H | 6.900038 | 2.017122 | 1.281662 |
| 45 | H | 5.700889 | -1.04038 | 1.582081 |
| 46 | H | 5.937744 | -0.78386 | -0.16533 |
| 47 | H | 7.047125 | -0.04086 | 1.002824 |
| 48 | H | -0.67808 | 2.180662 | -2.06858 |
| 49 | H | -1.85261 | 4.351876 | -2.27332 |
| 50 | H | -2.95151 | 5.358925 | -0.28027 |
| 51 | H | -2.85787 | 4.166409 | 1.905937 |

Table S3. Calculated atomic coordinates of **6-Br-SRho**.

| Atom# | Symbol | X        | Y        | Z        |
|-------|--------|----------|----------|----------|
| 1     | C      | 3.823651 | 0.862222 | 0.738119 |
| 2     | C      | 2.992991 | 2.024196 | 0.77916  |
| 3     | C      | 1.649571 | 1.928315 | 0.556087 |
| 4     | C      | 0.999858 | 0.693747 | 0.276565 |
| 5     | C      | 1.838517 | -0.45664 | 0.249659 |
| 6     | C      | 3.203247 | -0.37874 | 0.467963 |
| 7     | C      | -0.39946 | 0.640636 | 0.079169 |
| 8     | C      | -1.10379 | -0.5321  | -0.27855 |
| 9     | C      | -0.49384 | -1.81589 | -0.36355 |
| 10    | S      | 1.211112 | -2.06498 | -0.04767 |
| 11    | C      | -2.50281 | -0.4922  | -0.53523 |
| 12    | C      | -3.22934 | -1.60331 | -0.8537  |
| 13    | C      | -2.60077 | -2.88333 | -0.94644 |
| 14    | C      | -1.21259 | -2.95299 | -0.68971 |
| 15    | N      | -3.31015 | -3.98614 | -1.27027 |
| 16    | C      | -4.74621 | -3.89922 | -1.53567 |
| 17    | C      | -2.65207 | -5.28789 | -1.35915 |

|    |    |          |          |          |
|----|----|----------|----------|----------|
| 18 | N  | 5.155146 | 0.950445 | 0.947261 |
| 19 | C  | 5.783619 | 2.24348  | 1.218709 |
| 20 | C  | 5.991685 | -0.24692 | 0.898797 |
| 21 | C  | -1.13861 | 1.936511 | 0.022587 |
| 22 | C  | -1.20998 | 2.570782 | -1.22077 |
| 23 | C  | -1.88225 | 3.779699 | -1.32202 |
| 24 | C  | -2.48526 | 4.380036 | -0.22355 |
| 25 | C  | -2.40153 | 3.735975 | 1.004297 |
| 26 | C  | -1.73573 | 2.517167 | 1.147677 |
| 27 | Br | -1.97853 | 4.643353 | -3.03131 |
| 28 | C  | -1.66102 | 1.830054 | 2.503784 |
| 29 | O  | -1.07463 | 0.710973 | 2.515832 |
| 30 | O  | -2.17984 | 2.420191 | 3.483596 |
| 31 | H  | 3.421109 | 2.996896 | 0.986877 |
| 32 | H  | 1.050124 | 2.831722 | 0.596323 |
| 33 | H  | 3.792298 | -1.28778 | 0.427062 |
| 34 | H  | -3.01394 | 0.462629 | -0.47052 |
| 35 | H  | -4.29201 | -1.49983 | -1.03474 |
| 36 | H  | -0.69225 | -3.90218 | -0.74606 |
| 37 | H  | -5.2924  | -3.53499 | -0.65681 |
| 38 | H  | -4.9547  | -3.2319  | -2.38094 |
| 39 | H  | -5.11818 | -4.89288 | -1.78348 |
| 40 | H  | -2.20155 | -5.57047 | -0.39919 |
| 41 | H  | -3.3915  | -6.04156 | -1.6278  |
| 42 | H  | -1.86688 | -5.28317 | -2.12593 |
| 43 | H  | 5.636652 | 2.940277 | 0.384203 |
| 44 | H  | 5.379994 | 2.698122 | 2.131696 |
| 45 | H  | 6.853879 | 2.092187 | 1.355191 |
| 46 | H  | 5.682452 | -0.97711 | 1.657447 |
| 47 | H  | 5.941608 | -0.72547 | -0.08764 |
| 48 | H  | 7.02611  | 0.034356 | 1.093264 |
| 49 | H  | -0.74374 | 2.118128 | -2.09069 |
| 50 | H  | -3.00697 | 5.326217 | -0.32226 |
| 51 | H  | -2.8608  | 4.179275 | 1.882339 |

Table S4. Calculated atomic coordinates of **6-CO<sub>2</sub>Me-SRho**.

| Atom# | Symbol | X        | Y        | Z        |
|-------|--------|----------|----------|----------|
| 1     | C      | 4.05191  | 0.174284 | 1.130117 |
| 2     | C      | 3.2322   | 1.342959 | 1.193743 |
| 3     | C      | 1.88827  | 1.264332 | 0.966758 |
| 4     | C      | 1.227249 | 0.042213 | 0.66005  |
| 5     | C      | 2.054862 | -1.11553 | 0.613151 |
| 6     | C      | 3.419908 | -1.05515 | 0.83538  |

|    |   |          |          |          |
|----|---|----------|----------|----------|
| 7  | C | -0.17218 | 0.006948 | 0.458852 |
| 8  | C | -0.88658 | -1.15263 | 0.077862 |
| 9  | C | -0.28962 | -2.44113 | -0.02613 |
| 10 | S | 1.412283 | -2.71228 | 0.28755  |
| 11 | C | -2.28382 | -1.09416 | -0.18485 |
| 12 | C | -3.0208  | -2.19276 | -0.52236 |
| 13 | C | -2.40598 | -3.4782  | -0.62943 |
| 14 | C | -1.01924 | -3.56593 | -0.37068 |
| 15 | N | -3.12667 | -4.56909 | -0.96843 |
| 16 | C | -4.55918 | -4.46114 | -1.24494 |
| 17 | C | -2.48364 | -5.87753 | -1.06839 |
| 18 | N | 5.383957 | 0.245489 | 1.342506 |
| 19 | C | 6.024247 | 1.526461 | 1.641982 |
| 20 | C | 6.208011 | -0.95974 | 1.27775  |
| 21 | C | -0.89973 | 1.310203 | 0.427083 |
| 22 | C | -0.94267 | 1.991287 | -0.78699 |
| 23 | C | -1.60367 | 3.216287 | -0.89199 |
| 24 | C | -2.2292  | 3.763181 | 0.233854 |
| 25 | C | -2.18495 | 3.080902 | 1.439963 |
| 26 | C | -1.52586 | 1.855166 | 1.556408 |
| 27 | C | -1.6114  | 3.893299 | -2.21549 |
| 28 | O | -2.27077 | 5.062252 | -2.18667 |
| 29 | O | -1.08134 | 3.444539 | -3.21688 |
| 30 | C | -2.32518 | 5.787731 | -3.43932 |
| 31 | C | -1.48827 | 1.12064  | 2.89168  |
| 32 | O | -0.86014 | 0.025125 | 2.891552 |
| 33 | O | -2.07561 | 1.655068 | 3.8641   |
| 34 | H | 3.668878 | 2.306904 | 1.423307 |
| 35 | H | 1.297368 | 2.172301 | 1.025524 |
| 36 | H | 4.0002   | -1.96899 | 0.779045 |
| 37 | H | -2.78528 | -0.13503 | -0.10968 |
| 38 | H | -4.0814  | -2.07526 | -0.70686 |
| 39 | H | -0.5084  | -4.5194  | -0.44063 |
| 40 | H | -5.10894 | -4.10316 | -0.3657  |
| 41 | H | -4.75226 | -3.7793  | -2.08225 |
| 42 | H | -4.94056 | -5.44659 | -1.5105  |
| 43 | H | -2.03243 | -6.1707  | -0.11202 |
| 44 | H | -3.2328  | -6.62128 | -1.33785 |
| 45 | H | -1.70149 | -5.87737 | -1.83843 |
| 46 | H | 5.880023 | 2.24369  | 0.824582 |
| 47 | H | 5.627988 | 1.963147 | 2.567011 |
| 48 | H | 7.093767 | 1.36314  | 1.770237 |
| 49 | H | 5.889697 | -1.69798 | 2.024817 |
| 50 | H | 6.155036 | -1.42288 | 0.284172 |

|    |   |          |          |          |
|----|---|----------|----------|----------|
| 51 | H | 7.244947 | -0.69222 | 1.478189 |
| 52 | H | -0.45842 | 1.570157 | -1.66357 |
| 53 | H | -2.74562 | 4.714152 | 0.164329 |
| 54 | H | -2.66485 | 3.490179 | 2.323266 |
| 55 | H | -2.8914  | 6.692998 | -3.22237 |
| 56 | H | -1.3151  | 6.035978 | -3.77525 |
| 57 | H | -2.83245 | 5.188811 | -4.20005 |

Table S5. Calculated atomic coordinates of **5-NO<sub>2</sub>-SRho**.

| Atom# | Symbol | X        | Y        | Z        |
|-------|--------|----------|----------|----------|
| 1     | C      | 3.959457 | 0.636126 | 0.72709  |
| 2     | C      | 3.125569 | 1.795306 | 0.786781 |
| 3     | C      | 1.781891 | 1.698588 | 0.568005 |
| 4     | C      | 1.134868 | 0.465426 | 0.274516 |
| 5     | C      | 1.976724 | -0.68271 | 0.229308 |
| 6     | C      | 3.341563 | -0.60334 | 0.443563 |
| 7     | C      | -0.26356 | 0.408765 | 0.081559 |
| 8     | C      | -0.96943 | -0.76066 | -0.27891 |
| 9     | C      | -0.35601 | -2.04195 | -0.38275 |
| 10    | S      | 1.352856 | -2.28811 | -0.08857 |
| 11    | C      | -2.37148 | -0.72209 | -0.52089 |
| 12    | C      | -3.09761 | -1.83206 | -0.84262 |
| 13    | C      | -2.4659  | -3.10928 | -0.95467 |
| 14    | C      | -1.07477 | -3.17739 | -0.71279 |
| 15    | N      | -3.17499 | -4.21053 | -1.28204 |
| 16    | C      | -4.61473 | -4.12632 | -1.52902 |
| 17    | C      | -2.51288 | -5.50848 | -1.39619 |
| 18    | N      | 5.290884 | 0.725555 | 0.932347 |
| 19    | C      | 5.917126 | 2.017024 | 1.217294 |
| 20    | C      | 6.130311 | -0.46939 | 0.869761 |
| 21    | C      | -1.00563 | 1.703156 | 0.038195 |
| 22    | C      | -1.08177 | 2.355679 | -1.19818 |
| 23    | C      | -1.74963 | 3.562988 | -1.32282 |
| 24    | C      | -2.34068 | 4.106612 | -0.18623 |
| 25    | C      | -2.27803 | 3.481335 | 1.049726 |
| 26    | C      | -1.60641 | 2.268155 | 1.171435 |
| 27    | C      | -1.53599 | 1.573426 | 2.529217 |
| 28    | O      | -0.93713 | 0.463897 | 2.53874  |
| 29    | O      | -2.07333 | 2.158755 | 3.499998 |
| 30    | N      | -3.05474 | 5.385465 | -0.30113 |
| 31    | O      | -3.59137 | 5.84174  | 0.704284 |
| 32    | O      | -3.07972 | 5.935701 | -1.39895 |
| 33    | H      | 3.551515 | 2.766255 | 1.006591 |

|    |   |          |          |          |
|----|---|----------|----------|----------|
| 34 | H | 1.181913 | 2.600885 | 0.624079 |
| 35 | H | 3.933143 | -1.51    | 0.389208 |
| 36 | H | -2.88696 | 0.229427 | -0.442   |
| 37 | H | -4.16233 | -1.73011 | -1.01189 |
| 38 | H | -0.55258 | -4.12462 | -0.78292 |
| 39 | H | -5.15014 | -3.7676  | -0.64148 |
| 40 | H | -4.83554 | -3.45573 | -2.36856 |
| 41 | H | -4.98721 | -5.11992 | -1.77627 |
| 42 | H | -2.05286 | -5.80347 | -0.44453 |
| 43 | H | -3.25194 | -6.26069 | -1.66965 |
| 44 | H | -1.73479 | -5.48877 | -2.16979 |
| 45 | H | 5.761042 | 2.724494 | 0.393656 |
| 46 | H | 5.51894  | 2.457179 | 2.139713 |
| 47 | H | 6.988913 | 1.867532 | 1.343037 |
| 48 | H | 5.823314 | -1.20829 | 1.620742 |
| 49 | H | 6.080113 | -0.93691 | -0.12187 |
| 50 | H | 7.164211 | -0.18778 | 1.066271 |
| 51 | H | -0.61116 | 1.908241 | -2.06917 |
| 52 | H | -1.81221 | 4.071146 | -2.2776  |
| 53 | H | -2.74084 | 3.91755  | 1.926583 |

## 5.2 Major MO transitions in excited states

### ORho

|   |   |           |           |            |                                              |
|---|---|-----------|-----------|------------|----------------------------------------------|
| # | 1 | 2.7790 eV | 446.15 nm | f= 0.90403 | Spin multiplicity= 1:                        |
|   |   |           |           |            | H -> L 97.2%                                 |
| # | 2 | 2.9830 eV | 415.64 nm | f= 0.13762 | Spin multiplicity= 1:                        |
|   |   |           |           |            | H-1 -> L 96.1%                               |
| # | 3 | 3.2600 eV | 380.32 nm | f= 0.05895 | Spin multiplicity= 1:                        |
|   |   |           |           |            | H-2 -> L 91.7%                               |
| # | 4 | 3.3470 eV | 370.43 nm | f= 0.06289 | Spin multiplicity= 1:                        |
|   |   |           |           |            | H-4 -> L 88.6%, H-3 -> L 7.5%                |
| # | 5 | 3.4480 eV | 359.58 nm | f= 0.00557 | Spin multiplicity= 1:                        |
|   |   |           |           |            | H-3 -> L 83.4%, H-4 -> L 8.2%                |
| # | 6 | 3.8010 eV | 326.19 nm | f= 0.00464 | Spin multiplicity= 1:                        |
|   |   |           |           |            | H-5 -> L 81.8%, H-7 -> L 8.9%, H-6 -> L 7.4% |
| # | 7 | 3.9390 eV | 314.76 nm | f= 0.00582 | Spin multiplicity= 1:                        |

H-6 -> L 66.8%, H-7 -> L 17.7%, H-5 -> L 14.5%

# 8 4.1650 eV 297.68 nm f= 0.01806 Spin multiplicity= 1:  
H-7 -> L 53.6%, H-6 -> L 17.1%, H -> L+1 12.2%, H -> L+2 7.9%

# 9 4.2230 eV 293.59 nm f= 0.00067 Spin multiplicity= 1:  
H-1 -> L+1 69.9%, H-1 -> L+2 16.8%

# 10 4.4230 eV 280.32 nm f= 0.14835 Spin multiplicity= 1:  
H -> L+1 83.9%, H-7 -> L 7.8%

# 11 4.5080 eV 275.03 nm f= 0.00322 Spin multiplicity= 1:  
H-8 -> L 72.0%, H -> L+5 9.6%, H-2 -> L+1 7.9%

# 12 4.5510 eV 272.43 nm f= 0.00044 Spin multiplicity= 1:  
H-2 -> L+1 49.2%, H-2 -> L+2 15.9%, H-3 -> L+1 13.5%, H-8 -> L 8.4%

# 13 4.6250 eV 268.07 nm f= 0.12021 Spin multiplicity= 1:  
H -> L+2 83.2%

# 14 4.7760 eV 259.60 nm f= 0.01937 Spin multiplicity= 1:  
H-1 -> L+2 58.8%, H-1 -> L+1 13.6%, H-8 -> L 10.0%, H -> L+5 9.1%

# 15 4.8910 eV 253.49 nm f= 0.01178 Spin multiplicity= 1:  
H -> L+5 31.2%, H -> L+3 21.1%, H-1 -> L+2 12.3%, H -> L+4 11.9%, H-1 -> L+3 5.7%, H-  
8 -> L 5.3%

# 16 4.9310 eV 251.44 nm f= 0.03778 Spin multiplicity= 1:  
H -> L+3 62.5%, H -> L+5 23.7%

# 17 5.0360 eV 246.20 nm f= 0.01345 Spin multiplicity= 1:  
H-1 -> L+3 80.2%, H -> L+5 6.3%

# 18 5.0910 eV 243.54 nm f= 0.13288 Spin multiplicity= 1:  
H -> L+4 67.3%, H -> L+3 10.0%

# 19 5.1590 eV 240.33 nm f= 0.01330 Spin multiplicity= 1:  
H-2 -> L+2 43.9%, H-2 -> L+3 25.2%, H-2 -> L+1 11.4%, H-3 -> L+3 6.7%

# 20 5.2400 eV 236.61 nm f= 0.04266 Spin multiplicity= 1:  
H-4 -> L+1 49.3%, H-3 -> L+1 16.4%, H-1 -> L+5 7.9%

**SRho**



# 1 2.6930 eV 460.39 nm f= 0.84123 Spin multiplicity= 1:  
H -> L 96.6%

# 2 2.8970 eV 427.97 nm f= 0.12824 Spin multiplicity= 1:  
H-1 -> L 95.6%

# 3 3.0740 eV 403.33 nm f= 0.00366 Spin multiplicity= 1:  
H-2 -> L 95.5%

# 4 3.1800 eV 389.89 nm f= 0.06216 Spin multiplicity= 1:  
H-3 -> L 96.8%

# 5 3.2600 eV 380.32 nm f= 0.06269 Spin multiplicity= 1:  
H-4 -> L 96.6%

# 6 3.6900 eV 336.00 nm f= 0.00008 Spin multiplicity= 1:  
H-5 -> L 82.3%, H-7 -> L 15.9%

# 7 3.8360 eV 323.21 nm f= 0.00438 Spin multiplicity= 1:  
H-7 -> L 82.0%, H-5 -> L 15.6%

# 8 4.0420 eV 306.74 nm f= 0.00796 Spin multiplicity= 1:  
H-6 -> L 69.7%, H -> L+1 22.2%

# 9 4.1880 eV 296.05 nm f= 0.00004 Spin multiplicity= 1:  
H-1 -> L+1 46.4%, H-1 -> L+2 42.2%

# 10 4.3190 eV 287.07 nm f= 0.23375 Spin multiplicity= 1:  
H -> L+1 72.9%, H-6 -> L 18.7%

# 11 4.4050 eV 281.46 nm f= 0.01649 Spin multiplicity= 1:  
H-8 -> L 49.1%, H -> L+3 25.7%, H-2 -> L+1 7.8%, H-1 -> L+2 6.4%, H-1 -> L+1 5.1%

# 12 4.5210 eV 274.24 nm f= 0.00324 Spin multiplicity= 1:  
H-3 -> L+2 38.8%, H-3 -> L+1 35.0%, H-1 -> L+1 10.0%, H-8 -> L 7.4%

# 13 4.5910 eV 270.06 nm f= 0.05404 Spin multiplicity= 1:  
H -> L+2 90.1%

# 14 4.6030 eV 269.36 nm f= 0.00039 Spin multiplicity= 1:  
H-1 -> L+2 36.5%, H-1 -> L+1 28.8%, H-8 -> L 13.6%, H-3 -> L+2 12.7%

# 15 4.6650 eV 265.78 nm f= 0.10984 Spin multiplicity= 1:  
H -> L+3 33.2%, H-8 -> L 28.4%, H-2 -> L+1 23.9%

# 16 4.8220 eV 257.12 nm f= 0.84781 Spin multiplicity= 1:  
H-2 -> L+1 52.5%, H -> L+3 34.4%

# 17 4.9120 eV 252.41 nm f= 0.03772 Spin multiplicity= 1:  
H -> L+4 90.4%

# 18 4.9690 eV 249.52 nm f= 0.00667 Spin multiplicity= 1:  
H-1 -> L+4 87.0%

# 19 4.9830 eV 248.81 nm f= 0.00018 Spin multiplicity= 1:  
H-1 -> L+3 73.5%, H -> L+5 15.0%

# 20 5.0480 eV 245.61 nm f= 0.00448 Spin multiplicity= 1:  
H-3 -> L+1 46.7%, H-3 -> L+2 31.0%, H-3 -> L+4 11.2%

### 6-Br-SRho

# 1 2.6680 eV 464.71 nm f= 0.85311 Spin multiplicity= 1:  
H -> L 96.8%

# 2 2.8790 eV 430.65 nm f= 0.12245 Spin multiplicity= 1:  
H-1 -> L 95.7%

# 3 3.0390 eV 407.98 nm f= 0.00519 Spin multiplicity= 1:  
H-2 -> L 95.5%

# 4 3.1820 eV 389.64 nm f= 0.05405 Spin multiplicity= 1:  
H-3 -> L 97.1%

# 5 3.2490 eV 381.61 nm f= 0.05414 Spin multiplicity= 1:  
H-4 -> L 95.5%

# 6 3.5670 eV 347.59 nm f= 0.00177 Spin multiplicity= 1:  
H-5 -> L 95.7%

# 7 4.0010 eV 309.88 nm f= 0.00752 Spin multiplicity= 1:  
H-7 -> L 55.6%, H-6 -> L 31.8%, H -> L+1 6.9%

# 8 4.0190 eV 308.50 nm f= 0.00486 Spin multiplicity= 1:  
H-7 -> L 41.7%, H-6 -> L 37.4%, H -> L+1 12.2%

# 9 4.0580 eV 305.53 nm f= 0.00019 Spin multiplicity= 1:  
H-1 -> L+1 67.3%, H-1 -> L+2 19.4%

# 10 4.2220 eV 293.66 nm f= 0.15688 Spin multiplicity= 1:  
H -> L+1 78.1%, H-6 -> L 15.7%

# 11 4.3800 eV 283.07 nm f= 0.00839 Spin multiplicity= 1:  
H-3 -> L+1 29.4%, H-8 -> L 28.0%, H -> L+4 12.9%, H-3 -> L+2 9.9%, H-2 -> L+1 5.1%, H-1 -> L+1 5.1%

# 12 4.4100 eV 281.14 nm f= 0.01367 Spin multiplicity= 1:  
H-3 -> L+1 36.4%, H-8 -> L 28.1%, H-3 -> L+2 13.6%, H -> L+4 9.8%

# 13 4.4440 eV 278.99 nm f= 0.10977 Spin multiplicity= 1:  
H -> L+2 83.2%, H-6 -> L 6.2%

# 14 4.5650 eV 271.60 nm f= 0.00050 Spin multiplicity= 1:  
H-1 -> L+2 59.9%, H-1 -> L+1 16.2%, H-8 -> L 13.7%

# 15 4.6420 eV 267.09 nm f= 0.13310 Spin multiplicity= 1:  
H -> L+4 31.1%, H-8 -> L 26.5%, H-2 -> L+1 21.7%, H-2 -> L+2 9.2%

# 16 4.7010 eV 263.74 nm f= 0.06003 Spin multiplicity= 1:  
H -> L+3 89.7%

# 17 4.7820 eV 259.27 nm f= 0.48993 Spin multiplicity= 1:  
H-2 -> L+1 42.0%, H -> L+4 22.5%, H-1 -> L+3 22.2%

# 18 4.8050 eV 258.03 nm f= 0.15712 Spin multiplicity= 1:  
H-1 -> L+3 63.4%, H -> L+4 14.6%, H-2 -> L+1 9.5%, H-1 -> L+1 5.3%

# 19 4.9370 eV 251.13 nm f= 0.00005 Spin multiplicity= 1:  
H-3 -> L+2 43.6%, H-3 -> L+3 34.7%, H-3 -> L+1 13.3%

# 20 4.9760 eV 249.16 nm f= 0.22990 Spin multiplicity= 1:  
H-2 -> L+2 69.6%, H-2 -> L+1 12.5%

### **6-CO<sub>2</sub>Me-SRho**

# 1 2.6760 eV 463.32 nm f= 0.85779 Spin multiplicity= 1:  
H -> L 96.8%

# 2 2.9070 eV 426.50 nm f= 0.12675 Spin multiplicity= 1:  
H-1 -> L 95.2%

# 3 3.0480 eV 406.77 nm f= 0.00689 Spin multiplicity= 1:

H-2 -> L 95.2%

# 4 3.2080 eV 386.48 nm f= 0.04811 Spin multiplicity= 1:

H-3 -> L 97.1%

# 5 3.2830 eV 377.66 nm f= 0.05072 Spin multiplicity= 1:

H-4 -> L 97.5%

# 6 3.5810 eV 346.23 nm f= 0.00008 Spin multiplicity= 1:

H-1 -> L+1 87.5%, H-2 -> L+1 6.7%

# 7 3.6190 eV 342.59 nm f= 0.02435 Spin multiplicity= 1:

H -> L+1 98.8%

# 8 3.8830 eV 319.30 nm f= 0.00057 Spin multiplicity= 1:

H-6 -> L 65.4%, H-7 -> L 32.5%

# 9 3.9070 eV 317.34 nm f= 0.00020 Spin multiplicity= 1:

H-3 -> L+1 90.5%

# 10 4.0150 eV 308.80 nm f= 0.00223 Spin multiplicity= 1:

H-7 -> L 66.4%, H-6 -> L 32.2%

# 11 4.0320 eV 307.50 nm f= 0.02260 Spin multiplicity= 1:

H-5 -> L 75.8%, H -> L+2 18.3%

# 12 4.2310 eV 293.04 nm f= 0.05127 Spin multiplicity= 1:

H-2 -> L+1 88.8%, H-1 -> L+1 6.0%

# 13 4.4000 eV 281.78 nm f= 0.26460 Spin multiplicity= 1:

H -> L+2 74.5%, H-5 -> L 15.4%

# 14 4.4060 eV 281.40 nm f= 0.00519 Spin multiplicity= 1:

H-8 -> L 58.3%, H -> L+4 23.6%, H-1 -> L+2 8.6%

# 15 4.4820 eV 276.63 nm f= 0.00303 Spin multiplicity= 1:

H-4 -> L+1 97.5%

# 16 4.5970 eV 269.71 nm f= 0.00239 Spin multiplicity= 1:

H-1 -> L+2 66.9%, H-8 -> L 21.7%, H -> L+4 5.4%

# 17 4.6710 eV 265.43 nm f= 0.05766 Spin multiplicity= 1:

H -> L+4 38.1%, H-2 -> L+2 25.2%, H-8 -> L 18.0%, H-1 -> L+2 12.9%

# 18 4.7570 eV 260.64 nm f= 0.03418 Spin multiplicity= 1:

H -> L+3 92.1%

# 19 4.8500 eV 255.64 nm f= 0.91754 Spin multiplicity= 1:

H-2 -> L+2 59.7%, H -> L+4 27.2%

# 20 4.8730 eV 254.43 nm f= 0.03388 Spin multiplicity= 1:

H-7 -> L+1 75.1%, H-6 -> L+3 12.8%

### 5-NO<sub>2</sub>-SRho

# 1 2.6580 eV 466.46 nm f= 0.87492 Spin multiplicity= 1:

H -> L 97.0%

# 2 2.8210 eV 439.50 nm f= 0.00323 Spin multiplicity= 1:

H -> L+1 99.4%

# 3 2.9140 eV 425.48 nm f= 0.12441 Spin multiplicity= 1:

H-1 -> L 94.7%

# 4 3.0200 eV 410.54 nm f= 0.01229 Spin multiplicity= 1:

H-2 -> L 95.0%

# 5 3.0420 eV 407.57 nm f= 0.00081 Spin multiplicity= 1:

H-1 -> L+1 88.9%, H-2 -> L+1 9.1%

# 6 3.2320 eV 383.61 nm f= 0.04358 Spin multiplicity= 1:

H-3 -> L 97.5%

# 7 3.2920 eV 376.62 nm f= 0.04296 Spin multiplicity= 1:

H-4 -> L 98.0%

# 8 3.3390 eV 371.32 nm f= 0.00013 Spin multiplicity= 1:

H-3 -> L+1 89.4%, H-2 -> L+1 6.0%

# 9 3.4360 eV 360.84 nm f= 0.00040 Spin multiplicity= 1:

H-2 -> L+1 84.4%, H-3 -> L+1 7.7%, H-1 -> L+1 7.5%

# 10 3.6300 eV 341.55 nm f= 0.00568 Spin multiplicity= 1:

H-4 -> L+1 99.1%

# 11 3.8980 eV 318.07 nm f= 0.00009 Spin multiplicity= 1:

H-9 -> L+1 90.3%

# 12 3.9910 eV 310.66 nm f= 0.01655 Spin multiplicity= 1:

H-5 -> L 66.3%, H -> L+2 21.2%, H -> L+3 7.0%

# 13 4.0720 eV 304.48 nm f= 0.00016 Spin multiplicity= 1:  
H-1 -> L+2 67.4%, H-1 -> L+3 10.7%, H-2 -> L+2 9.4%

# 14 4.1260 eV 300.49 nm f= 0.00254 Spin multiplicity= 1:  
H-6 -> L 86.1%, H-7 -> L 8.2%

# 15 4.1710 eV 297.25 nm f= 0.19678 Spin multiplicity= 1:  
H -> L+2 74.0%, H-5 -> L 17.5%

# 16 4.2180 eV 293.94 nm f= 0.00083 Spin multiplicity= 1:  
H-5 -> L+1 88.1%

# 17 4.2500 eV 291.73 nm f= 0.02194 Spin multiplicity= 1:  
H-6 -> L+1 73.4%, H-7 -> L 14.7%

# 18 4.2600 eV 291.04 nm f= 0.00399 Spin multiplicity= 1:  
H-7 -> L 71.8%, H-6 -> L+1 14.0%, H-6 -> L 5.9%

# 19 4.3960 eV 282.04 nm f= 0.00558 Spin multiplicity= 1:  
H-3 -> L+2 54.8%, H-3 -> L+3 12.2%, H-8 -> L 11.6%, H -> L+4 5.5%

# 20 4.4220 eV 280.38 nm f= 0.02536 Spin multiplicity= 1:  
H-8 -> L 46.9%, H-3 -> L+2 18.5%, H -> L+4 16.1%

### 5.3 Molecular orbital composition analysis

Table S6. Composition of each shell in LUMO of **ORho**

|       |            |         |        |           |
|-------|------------|---------|--------|-----------|
| Shell | 6 Type: P  | in atom | 1(C) : | 2.97516 % |
| Shell | 7 Type: P  | in atom | 1(C) : | 2.94663 % |
| Shell | 8 Type: P  | in atom | 1(C) : | 1.27982 % |
| Shell | 17 Type: P | in atom | 2(C) : | 0.80211 % |
| Shell | 18 Type: P | in atom | 2(C) : | 0.79743 % |
| Shell | 19 Type: P | in atom | 2(C) : | 0.50568 % |
| Shell | 21 Type: D | in atom | 2(C) : | 0.53532 % |
| Shell | 28 Type: P | in atom | 3(C) : | 3.11049 % |
| Shell | 29 Type: P | in atom | 3(C) : | 3.00385 % |

---

|       |             |         |         |            |
|-------|-------------|---------|---------|------------|
| Shell | 30 Type: P  | in atom | 3(C) :  | 2.18759 %  |
| Shell | 43 Type: D  | in atom | 4(C) :  | 1.33192 %  |
| Shell | 50 Type: P  | in atom | 5(C) :  | 2.29655 %  |
| Shell | 51 Type: P  | in atom | 5(C) :  | 2.23401 %  |
| Shell | 52 Type: P  | in atom | 5(C) :  | 1.01104 %  |
| Shell | 72 Type: P  | in atom | 7(O) :  | 2.06075 %  |
| Shell | 73 Type: P  | in atom | 7(O) :  | 1.35463 %  |
| Shell | 83 Type: P  | in atom | 8(C) :  | 2.31200 %  |
| Shell | 84 Type: P  | in atom | 8(C) :  | 2.25022 %  |
| Shell | 85 Type: P  | in atom | 8(C) :  | 0.99980 %  |
| Shell | 98 Type: D  | in atom | 9(C) :  | 1.34222 %  |
| Shell | 105 Type: P | in atom | 10(C) : | 3.12806 %  |
| Shell | 106 Type: P | in atom | 10(C) : | 3.00787 %  |
| Shell | 107 Type: P | in atom | 10(C) : | 2.24284 %  |
| Shell | 116 Type: P | in atom | 11(C) : | 0.80950 %  |
| Shell | 117 Type: P | in atom | 11(C) : | 0.80176 %  |
| Shell | 118 Type: P | in atom | 11(C) : | 0.51313 %  |
| Shell | 120 Type: D | in atom | 11(C) : | 0.54040 %  |
| Shell | 127 Type: P | in atom | 12(C) : | 2.99418 %  |
| Shell | 128 Type: P | in atom | 12(C) : | 2.96570 %  |
| Shell | 129 Type: P | in atom | 12(C) : | 1.28716 %  |
| Shell | 149 Type: P | in atom | 14(N) : | 1.77011 %  |
| Shell | 150 Type: P | in atom | 14(N) : | 1.41279 %  |
| Shell | 182 Type: P | in atom | 17(N) : | 1.75450 %  |
| Shell | 183 Type: P | in atom | 17(N) : | 1.40068 %  |
| Shell | 215 Type: P | in atom | 20(C) : | 12.88617 % |
| Shell | 216 Type: P | in atom | 20(C) : | 11.14608 % |
| Shell | 217 Type: P | in atom | 20(C) : | 4.35832 %  |
| Shell | 230 Type: D | in atom | 21(C) : | 1.02886 %  |

---

---

|       |             |         |         |           |
|-------|-------------|---------|---------|-----------|
| Shell | 303 Type: P | in atom | 28(O) : | 0.86472 % |
| Shell | 304 Type: P | in atom | 28(O) : | 0.63175 % |

---

Table S7. Composition of each atom in LUMO of **ORho**

---

|      |         |            |
|------|---------|------------|
| Atom | 1(C) :  | 7.34979 %  |
| Atom | 2(C) :  | 2.72816 %  |
| Atom | 3(C) :  | 8.35558 %  |
| Atom | 4(C) :  | 2.14851 %  |
| Atom | 5(C) :  | 5.72942 %  |
| Atom | 6(C) :  | 0.55015 %  |
| Atom | 7(O) :  | 3.23623 %  |
| Atom | 8(C) :  | 5.75120 %  |
| Atom | 9(C) :  | 2.16353 %  |
| Atom | 10(C) : | 8.44939 %  |
| Atom | 11(C) : | 2.74913 %  |
| Atom | 12(C) : | 7.39724 %  |
| Atom | 13(C) : | 0.54902 %  |
| Atom | 14(N) : | 3.42856 %  |
| Atom | 15(C) : | 0.08750 %  |
| Atom | 16(C) : | 0.17370 %  |
| Atom | 17(N) : | 3.39804 %  |
| Atom | 18(C) : | 0.08688 %  |
| Atom | 19(C) : | 0.17234 %  |
| Atom | 20(C) : | 28.51252 % |
| Atom | 21(C) : | 1.17670 %  |
| Atom | 22(C) : | 0.49597 %  |
| Atom | 23(C) : | 0.18299 %  |
| Atom | 24(C) : | -0.01078 % |
| Atom | 25(C) : | 0.07673 %  |

---



---

|      |         |            |
|------|---------|------------|
| Atom | 26(C) : | 0.81952 %  |
| Atom | 27(C) : | -0.21005 % |
| Atom | 28(O) : | 1.44875 %  |
| Atom | 29(O) : | 0.02717 %  |
| Atom | 30(H) : | 0.01922 %  |
| Atom | 31(H) : | 0.06223 %  |
| Atom | 32(H) : | 0.00034 %  |
| Atom | 33(H) : | 0.06031 %  |
| Atom | 34(H) : | 0.01952 %  |
| Atom | 35(H) : | 0.00039 %  |
| Atom | 36(H) : | 0.00035 %  |
| Atom | 37(H) : | 0.39069 %  |
| Atom | 38(H) : | 0.38837 %  |
| Atom | 39(H) : | 0.28946 %  |
| Atom | 40(H) : | 0.00014 %  |
| Atom | 41(H) : | 0.28262 %  |
| Atom | 42(H) : | 0.39012 %  |
| Atom | 43(H) : | 0.38515 %  |
| Atom | 44(H) : | 0.00020 %  |
| Atom | 45(H) : | 0.28115 %  |
| Atom | 46(H) : | 0.28663 %  |
| Atom | 47(H) : | 0.00003 %  |
| Atom | 48(H) : | -0.00217 % |
| Atom | 49(H) : | 0.09271 %  |
| Atom | 50(H) : | 0.01024 %  |
| Atom | 51(H) : | 0.01838 %  |

---

Table S8. Composition of each shell in LUMO of **SRho**

---

|       |           |         |        |           |
|-------|-----------|---------|--------|-----------|
| Shell | 6 Type: P | in atom | 1(C) : | 2.87182 % |
|-------|-----------|---------|--------|-----------|

---

---

|       |             |         |         |            |
|-------|-------------|---------|---------|------------|
| Shell | 7 Type: P   | in atom | 1(C) :  | 2.85166 %  |
| Shell | 8 Type: P   | in atom | 1(C) :  | 1.20066 %  |
| Shell | 28 Type: P  | in atom | 3(C) :  | 2.71372 %  |
| Shell | 29 Type: P  | in atom | 3(C) :  | 2.64450 %  |
| Shell | 30 Type: P  | in atom | 3(C) :  | 2.03596 %  |
| Shell | 43 Type: D  | in atom | 4(C) :  | 1.32264 %  |
| Shell | 50 Type: P  | in atom | 5(C) :  | 2.99777 %  |
| Shell | 51 Type: P  | in atom | 5(C) :  | 2.72613 %  |
| Shell | 52 Type: P  | in atom | 5(C) :  | 1.07040 %  |
| Shell | 74 Type: P  | in atom | 7(S) :  | 1.20776 %  |
| Shell | 75 Type: P  | in atom | 7(S) :  | 2.64887 %  |
| Shell | 76 Type: P  | in atom | 7(S) :  | 2.31104 %  |
| Shell | 85 Type: P  | in atom | 8(C) :  | 2.99180 %  |
| Shell | 86 Type: P  | in atom | 8(C) :  | 2.71990 %  |
| Shell | 87 Type: P  | in atom | 8(C) :  | 1.06894 %  |
| Shell | 100 Type: D | in atom | 9(C) :  | 1.32298 %  |
| Shell | 107 Type: P | in atom | 10(C) : | 2.71016 %  |
| Shell | 108 Type: P | in atom | 10(C) : | 2.64224 %  |
| Shell | 109 Type: P | in atom | 10(C) : | 2.02901 %  |
| Shell | 129 Type: P | in atom | 12(C) : | 2.86640 %  |
| Shell | 130 Type: P | in atom | 12(C) : | 2.84632 %  |
| Shell | 131 Type: P | in atom | 12(C) : | 1.19744 %  |
| Shell | 151 Type: P | in atom | 14(N) : | 1.73517 %  |
| Shell | 152 Type: P | in atom | 14(N) : | 1.38498 %  |
| Shell | 184 Type: P | in atom | 17(N) : | 1.73924 %  |
| Shell | 185 Type: P | in atom | 17(N) : | 1.38817 %  |
| Shell | 217 Type: P | in atom | 20(C) : | 12.78481 % |
| Shell | 218 Type: P | in atom | 20(C) : | 11.43928 % |
| Shell | 219 Type: P | in atom | 20(C) : | 3.84905 %  |

---

|       |             |         |         |           |
|-------|-------------|---------|---------|-----------|
| Shell | 232 Type: D | in atom | 21(C) : | 0.96317 % |
| Shell | 305 Type: P | in atom | 28(O) : | 0.91374 % |
| Shell | 306 Type: P | in atom | 28(O) : | 0.66833 % |

Table S9. Composition of each atom in LUMO of **SRho**

|      |         |            |
|------|---------|------------|
| Atom | 1(C) :  | 7.03883 %  |
| Atom | 2(C) :  | 1.85565 %  |
| Atom | 3(C) :  | 7.42066 %  |
| Atom | 4(C) :  | 1.78860 %  |
| Atom | 5(C) :  | 6.86433 %  |
| Atom | 6(C) :  | 0.51811 %  |
| Atom | 7(S) :  | 6.61578 %  |
| Atom | 8(C) :  | 6.85038 %  |
| Atom | 9(C) :  | 1.78726 %  |
| Atom | 10(C) : | 7.40711 %  |
| Atom | 11(C) : | 1.85402 %  |
| Atom | 12(C) : | 7.02465 %  |
| Atom | 13(C) : | 0.51711 %  |
| Atom | 14(N) : | 3.36020 %  |
| Atom | 15(C) : | 0.11023 %  |
| Atom | 16(C) : | 0.14633 %  |
| Atom | 17(N) : | 3.36841 %  |
| Atom | 18(C) : | 0.11030 %  |
| Atom | 19(C) : | 0.14653 %  |
| Atom | 20(C) : | 28.17636 % |
| Atom | 21(C) : | 1.25799 %  |
| Atom | 22(C) : | 0.45143 %  |
| Atom | 23(C) : | 0.18564 %  |
| Atom | 24(C) : | -0.03561 % |

---

|      |       |              |
|------|-------|--------------|
| Atom | 25(C) | : 0.04552 %  |
| Atom | 26(C) | : 0.88200 %  |
| Atom | 27(C) | : -0.18813 % |
| Atom | 28(O) | : 1.54468 %  |
| Atom | 29(O) | : 0.03218 %  |
| Atom | 30(H) | : 0.01170 %  |
| Atom | 31(H) | : 0.05150 %  |
| Atom | 32(H) | : 0.00260 %  |
| Atom | 33(H) | : 0.05171 %  |
| Atom | 34(H) | : 0.01156 %  |
| Atom | 35(H) | : 0.00229 %  |
| Atom | 36(H) | : 0.00018 %  |
| Atom | 37(H) | : 0.34077 %  |
| Atom | 38(H) | : 0.34232 %  |
| Atom | 39(H) | : 0.30047 %  |
| Atom | 40(H) | : 0.00015 %  |
| Atom | 41(H) | : 0.31050 %  |
| Atom | 42(H) | : 0.34433 %  |
| Atom | 43(H) | : 0.33978 %  |
| Atom | 44(H) | : 0.00014 %  |
| Atom | 45(H) | : 0.30120 %  |
| Atom | 46(H) | : 0.31089 %  |
| Atom | 47(H) | : 0.00007 %  |
| Atom | 48(H) | : 0.02375 %  |
| Atom | 49(H) | : 0.09588 %  |
| Atom | 50(H) | : 0.01066 %  |
| Atom | 51(H) | : 0.01102 %  |

---

## 5.4 Spectra calculation

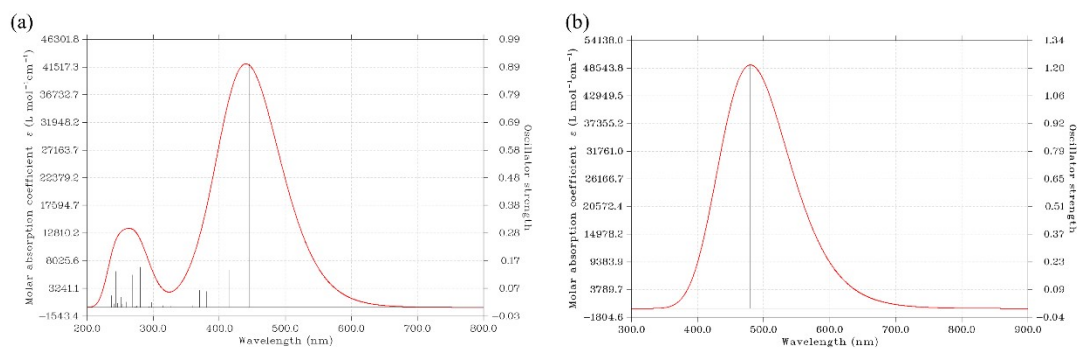

Fig. S19. Calculated absorption and emission spectra of **ORho**.

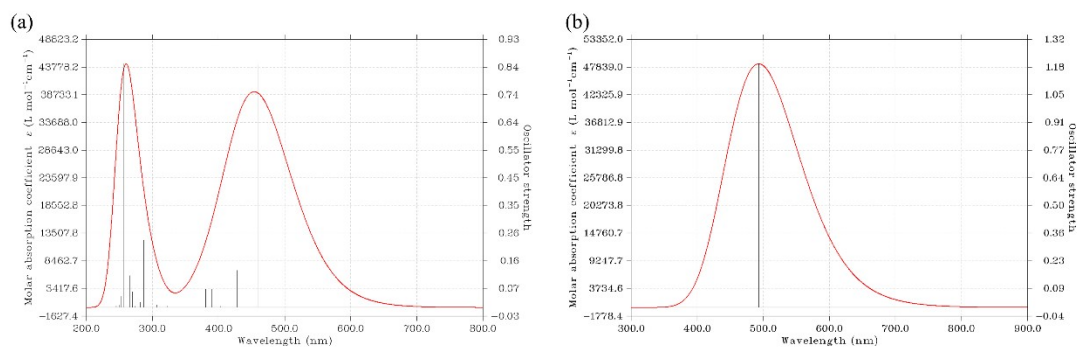

Fig. S20. Calculated absorption and emission spectra of **SRho**.

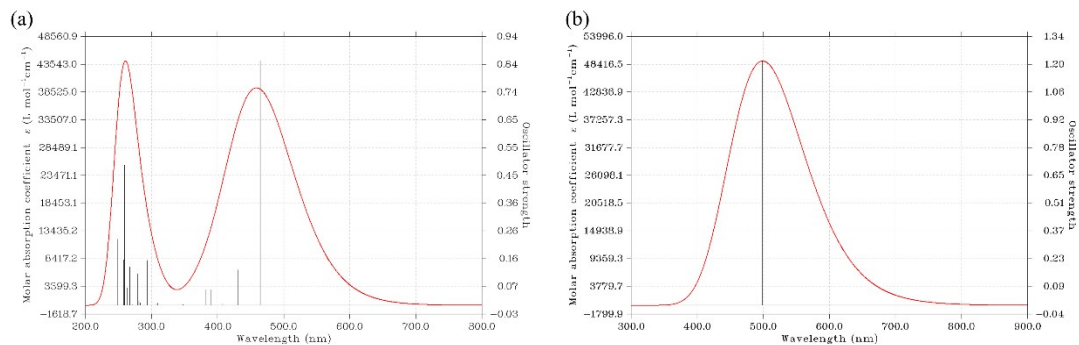

Fig. S21. Calculated absorption and emission spectra of **6-Br-SRho**.

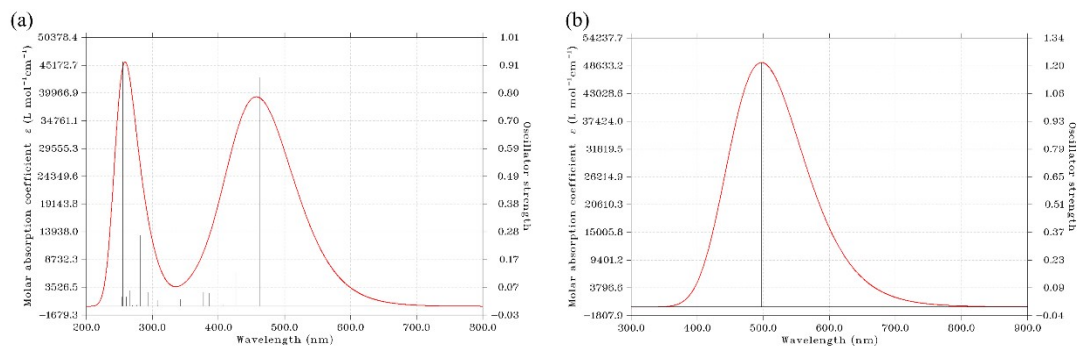

Fig. S22. Calculated absorption and emission spectra of **6-CO<sub>2</sub>Me-SRho**.

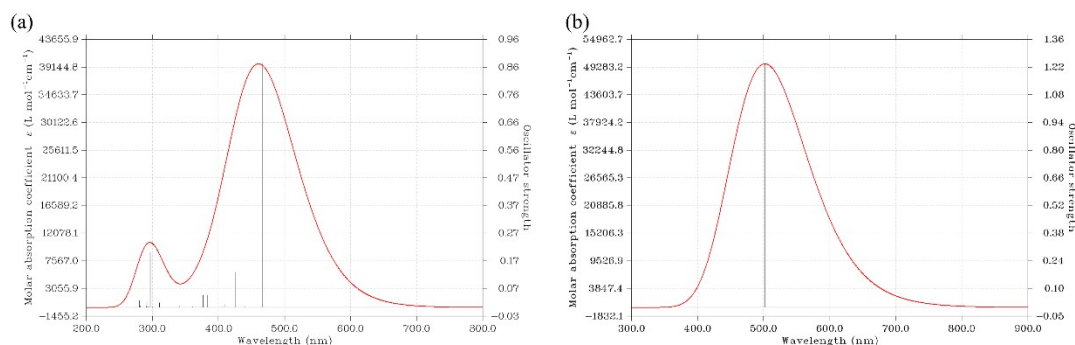

Fig. S23. Calculated absorption and emission spectra of 5-NO<sub>2</sub>-SRho.

### References :

1. F. Deng, L. Liu, W. Huang, C. Huang, Q. Qiao and Z. Xu, *Spectrochim. Acta A*, 2020, **240**, 118466.
2. T. M. McCormick, B. D. Calitree, A. Orchard, N. D. Kraut, F. V. Bright, M. R. Detty and R. Eisenberg, *J. Am. Chem. Soc.*, 2010, **132**, 15480-15483.
3. F. Neese, *WIREs Comput. Mol. Sci.*, 2012, **2**, 73-78.
4. F. Neese, *WIREs Comput. Mol. Sci.*, 2018, **8**, e1327.
5. F. Neese, F. Wennmohs, U. Becker and C. Riplinger, *The Journal of Chemical Physics*, 2020, **152**, 224108.
6. S. Grimme, A. Hansen, S. Ehlert and J.-M. Mewes, *The Journal of Chemical Physics*, 2021, **154**, 064103.
7. T. Lu and F. Chen, *J. Comput. Chem.*, 2012, **33**, 580-592.
8. M. D. Hanwell, D. E. Curtis, D. C. Lonie, T. Vandermeersch, E. Zurek and G. R. Hutchison, *J. Cheminform*, 2012, **4**, 17.
9. W. Humphrey, A. Dalke and K. Schulten, *J Mol Graph*, 1996, **14**, 33-38, 27-38.
